# Supplementary material
Source: PubMed Central journal article supplement (PMC2736347)

## Supporting Information

### **Structural and Synthetic Investigations of Tanikolide Dimer, a SIRT2 Selective Inhibitor, and Tanikolide Seco Acid from the Madagascar Marine Cyanobacterium *Lyngbya majuscula***

Marcelino Gutiérrez,<sup>†,‡</sup> Eric H. Andrianasolo,<sup>‡,§</sup> Won Kyo Shin,<sup>‡,⊥</sup> Douglas E. Goeger,<sup>§</sup> Alexander Yokochi,  
Jörg Schemies,<sup>Δ</sup> Manfred Jung,<sup>Δ</sup> Dennis France,<sup>○</sup> Susan Cornell-Kennon,<sup>○</sup> Eun Lee,<sup>⊥\*</sup> and William H.  
Gerwick<sup>†,§\*</sup>

## Supporting Information -Table of Contents

|                                                                                |    |
|--------------------------------------------------------------------------------|----|
| 1. General Experimental Methods                                                | 5  |
| 2. 400 MHz <sup>1</sup> H NMR of compound 2 in CD3OD                           | 6  |
| 3. 100 MHz <sup>13</sup> C NMR of compound 2 in CD3OD                          | 7  |
| 4. X-ray crystallographic data and structure refinement for compound 2         | 8  |
| 5. ORTEP of tanikolide sec acid 2 with 50% displacement ellipsoids             | 9  |
| 6. 400 MHz <sup>1</sup> H NMR of compound 3 in CDCl3                           | 10 |
| 7. 100 MHz <sup>13</sup> C NMR of compound 3 in CDCl3                          | 11 |
| 8. 100 MHz DEPT 135 spectrum of compound 3 in CDCl3                            | 12 |
| 9. 400 MHz <sup>1</sup> H- <sup>1</sup> H COSY spectrum of compound 3 in CDCl3 | 13 |
| 10. 400 MHz Multi-ended HSQC spectrum of compound 3 in CDCl3                   | 14 |
| 11. 400 MHz HMBC spectrum of compound 3 in CDCl3,<br>optimized for J = 8 Hz    | 15 |
| 12. LR TOF MS ES+ spectrum of compound 3                                       | 16 |
| 13. LR FAB (otg matrix) spectrum of compound 3                                 | 17 |
| 14. LR FAB (nba matrix) spectrum of compound 3                                 | 18 |
| 15. <sup>1</sup> H-NMR (500MHz, CDCl3) of the benzyl ether of epoxide 6        | 19 |
| 16. <sup>13</sup> C-NMR (125 MHz, CDCl3) of the benzyl ether of epoxide 6      | 20 |
| 17. <sup>1</sup> H-NMR (500MHz, CDCl3) of 7                                    | 21 |
| 18. <sup>13</sup> C-NMR (125 MHz, CDCl3) of 7                                  | 22 |
| 19. <sup>1</sup> H-NMR (500MHz, CDCl3) of sulfide derivative of 7              | 23 |
| 20. <sup>13</sup> C-NMR (125 MHz, CDCl3) of sulfide derivative of 7            | 24 |

|                                                                                                       |    |
|-------------------------------------------------------------------------------------------------------|----|
| 21. $^1\text{H-NMR}$ (500MHz, $\text{CDCl}_3$ ) of 8                                                  | 25 |
| 22. $^{13}\text{C-NMR}$ (125 MHz, $\text{CDCl}_3$ ) of 8                                              | 26 |
| 23. $^1\text{H-NMR}$ (500MHz, $\text{CDCl}_3$ ) of 10                                                 | 27 |
| 24. $^{13}\text{C-NMR}$ (125 MHz, $\text{CDCl}_3$ ) of 10                                             | 28 |
| 25. $^1\text{H-NMR}$ (500MHz, $\text{CDCl}_3$ ) of 13                                                 | 29 |
| 26. $^{13}\text{C-NMR}$ (125 MHz, $\text{CDCl}_3$ ) of 13                                             | 30 |
| 27. $^1\text{H-NMR}$ (500MHz, $\text{CDCl}_3$ ) of diene product of 10                                | 31 |
| 28. $^{13}\text{C-NMR}$ (125 MHz, $\text{CDCl}_3$ ) of diene product of 10                            | 32 |
| 29. $^1\text{H-NMR}$ (500MHz, $\text{CDCl}_3$ ) of 11                                                 | 33 |
| 30. $^{13}\text{C-NMR}$ (125 MHz, $\text{CDCl}_3$ ) of 11                                             | 34 |
| 31. $^1\text{H-NMR}$ (500MHz, $\text{CDCl}_3$ ) of diene product of 13                                | 35 |
| 32. $^{13}\text{C-NMR}$ (125 MHz, $\text{CDCl}_3$ ) of diene product of 13                            | 36 |
| 33. $^1\text{H-NMR}$ (500MHz, $\text{CDCl}_3$ ) of 14                                                 | 37 |
| 34. $^{13}\text{C-NMR}$ (125 MHz, $\text{CDCl}_3$ ) of 14                                             | 38 |
| 35. $^1\text{H-NMR}$ (500MHz, $\text{CDCl}_3$ ) of 12                                                 | 39 |
| 36. $^{13}\text{C-NMR}$ (125 MHz, $\text{CDCl}_3$ ) of 12                                             | 40 |
| 37. $^1\text{H-NMR}$ (500MHz, $\text{CDCl}_3$ ) of 5                                                  | 41 |
| 38. $^{13}\text{C-NMR}$ (125 MHz, $\text{CDCl}_3$ ) of 5                                              | 42 |
| 39. $^1\text{H-NMR}$ (500MHz, $\text{CDCl}_3$ ) of initial olefin metathesis product of triene 14     | 43 |
| 40. $^{13}\text{C-NMR}$ (125 MHz, $\text{CDCl}_3$ ) of initial olefin metathesis product of triene 14 | 44 |

|                                                                                         |    |
|-----------------------------------------------------------------------------------------|----|
| 41. <sup>1</sup> H-NMR (500MHz, CDCl <sub>3</sub> ) of 4                                | 45 |
| 42. <sup>13</sup> C-NMR (125 MHz, CDCl <sub>3</sub> ) of 4                              | 46 |
| 43. Inhibition dose response curves for compounds 4, 5,<br>and ent-5 to SIRT1 and SIRT2 | 47 |
| 44. Tanikolide dimer RS synthetic -Chiral GC-MC Analysis                                | 48 |
| 45. Tanikolide dimer RR synthetic -Chiral GC-MC Analysis                                | 49 |
| 46. Tanikolide dimer SS Synthetic -Chiral GC-MC Analysis                                | 50 |
| 47. Natural tanikolide dimer -Chiral GC-MC Analysis                                     | 51 |
| 48. Coinjected mix RR/RS synthetic -Chiral GC-MC Analysis                               | 52 |

**General Experimental Methods – Natural Products:** NMR spectra were referenced to residual solvent signal with resonances at  $\delta_{H/C}$  7.26 / 77.1 ( $CDCl_3$ ) and  $\delta_{H/C}$  3.31/49.15 ( $CD_3OD$ ). X-ray diffraction data were collected on a diffractometer with a HiStar Cu  $K\alpha$  radiation area detector. Structure solution and refinement was carried out using SHELXS and SHELXL, respectively. Chiral GC-MS analyses was performed on a Cyclosil-B chiral column (30m x 0.250 mm).

**General Experimental Methods – Synthesis:** NMR chemical shift values were recorded as parts per million relative to tetramethylsilane as an internal standard unless otherwise indicated, and coupling constants in Hertz. The progress of chemical reactions were checked on Merck TLC plates (Merck 5554 Kiesel gel 60 F254), and the spots were visualized under 254 nm UV light and/or by charring after dipping the TLC plate into a vanillin solution (9.0 g of vanillin and 1.5 mL of concentrated  $H_2SO_4$  in 300 mL of MeOH), a  $KMnO_4$  solution (3 g of  $KMnO_4$ , 20 g of  $K_2CO_3$ , and 5 mL of 5% NaOH solution in 300 mL of  $H_2O$ ), or a phosphomolybdic acid solution (250 mg phosphomolybdic acid in 50 mL EtOH). Column chromatography was performed on Merck silica gel (9385 Kiesel gel 60) using hexanes-EtOAc (v/v). The solvents were simple distilled unless otherwise noted. Unless otherwise specified, all reactions were conducted under a slight positive pressure of dry  $N_2$ . The usual work-up refers to washing the quenched reaction mixture with brine, drying the organic extracts over anhyd  $MgSO_4$  and evaporating under reduced pressure using a rotary evaporator. Solvents used in the reactions were dried under a  $N_2$  atmosphere. THF was distilled from Nabenzophenone, and  $CH_2Cl_2$  was distilled from  $P_2O_5$ . Benzene was washed with conc.  $H_2SO_4$ , distilled from Na-benzophenone, and stored over 4 Å molecular sieves. Et<sub>2</sub>O was distilled from  $LiAlH_4$ .  $CH_3CN$  was distilled from  $CaH_2$  and stored over 4 Å molecular sieves. Pyridine and triethylamine were distilled over KOH and stored over 4 Å molecular sieves.

400 MHz  $^1\text{H}$  NMR of compound **2** in  $\text{CD}_3\text{OD}$

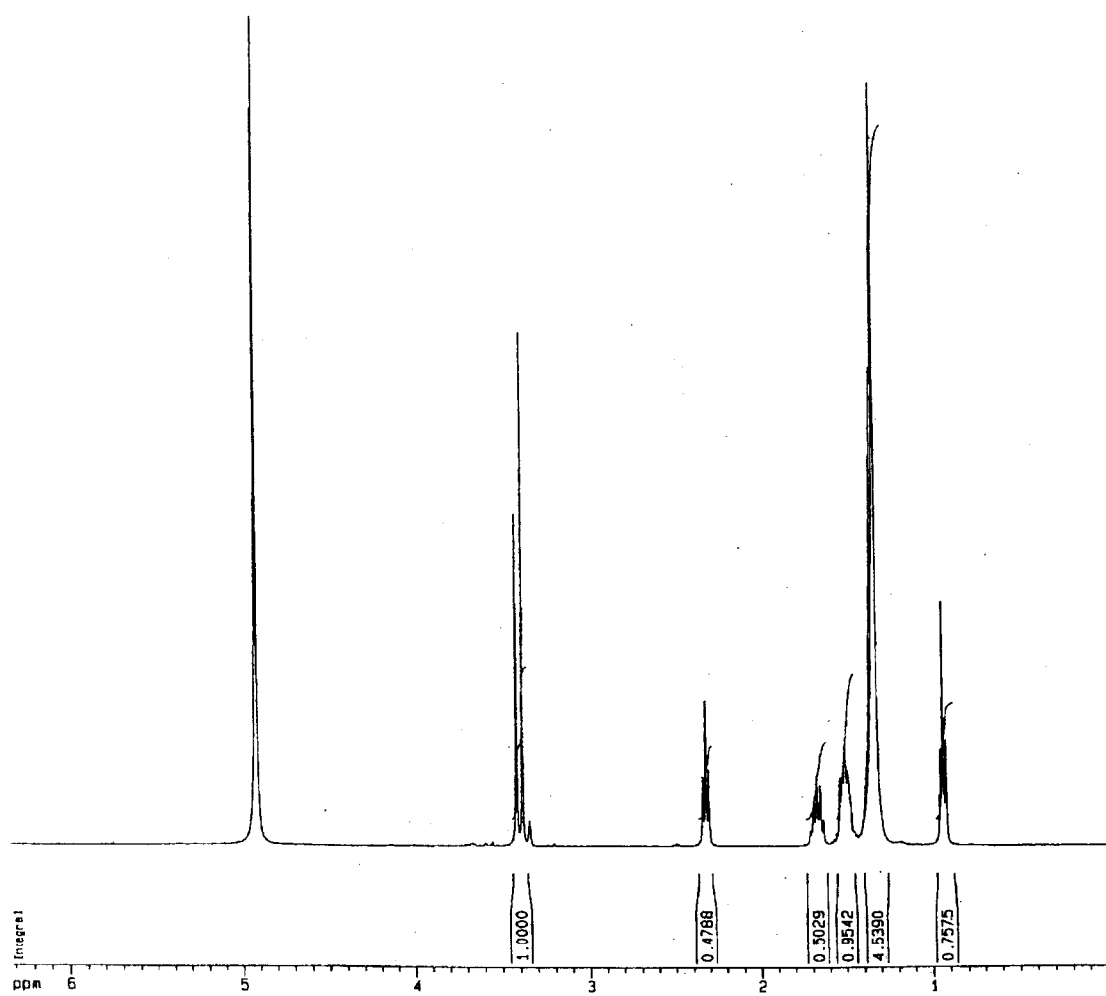

100 MHz  $^{13}\text{C}$  NMR of compound **2** in  $\text{CD}_3\text{OD}$

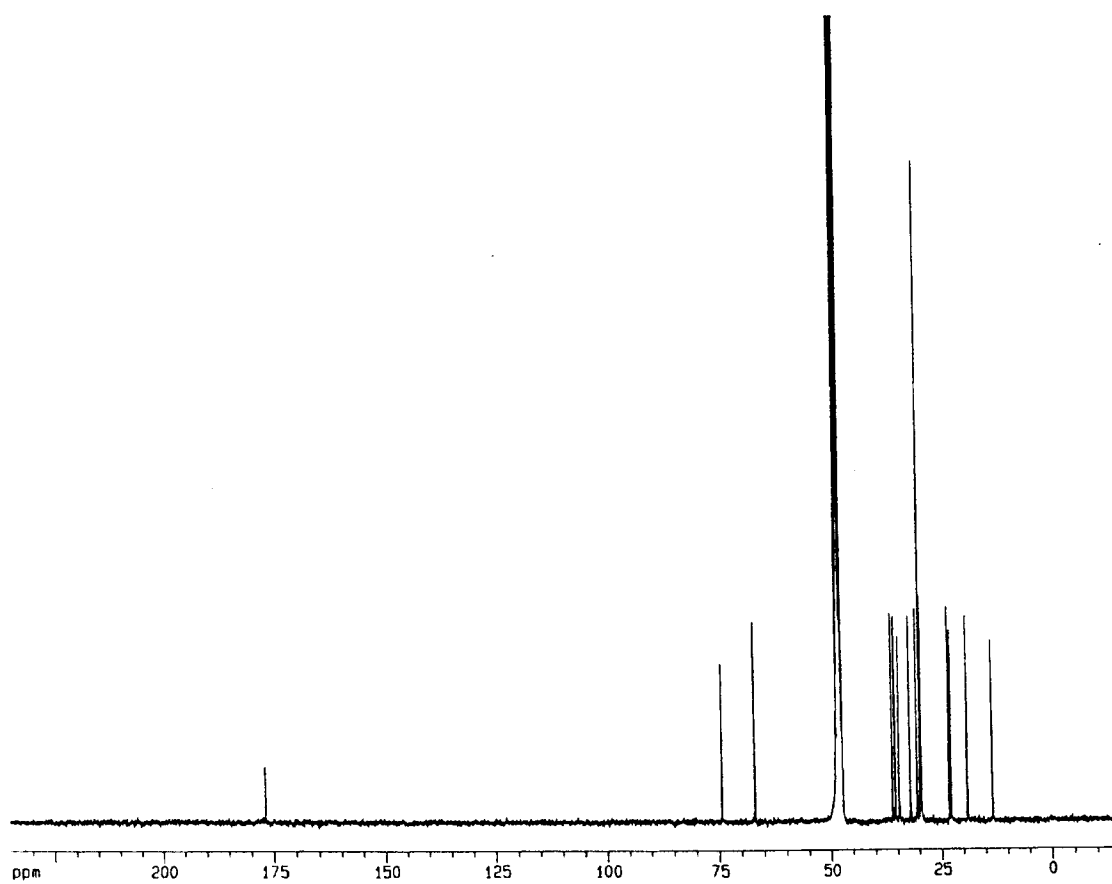

X-ray crystallographic data and structure refinement for compound **2**

|                                   |                                                |                 |
|-----------------------------------|------------------------------------------------|-----------------|
| Identification code               | WG112003                                       |                 |
| Empirical formula                 | C <sub>17</sub> H <sub>34</sub> O <sub>4</sub> |                 |
| Formula weight                    | 302.44                                         |                 |
| Temperature                       | 100(2) K                                       |                 |
| Wavelength                        | 1.54180 Å                                      |                 |
| Crystal system                    | Monoclinic                                     |                 |
| Space group                       | P2 <sub>1</sub>                                |                 |
| Unit cell dimensions              | a = 5.524(4) Å                                 | α = 90°         |
|                                   | b = 8.048(5) Å                                 | β = 97.180(14)° |
|                                   | c = 20.295(12) Å                               | γ = 90°         |
| Volume                            | 895.2(10) Å <sup>3</sup>                       |                 |
| Z                                 | 2                                              |                 |
| Density (calculated)              | 1.122 Mg/m <sup>3</sup>                        |                 |
| Absorption coefficient            | 0.618 mm <sup>-1</sup>                         |                 |
| F(000)                            | 336                                            |                 |
| Crystal size                      | 0.30 x 0.10 x 0.02 mm <sup>3</sup>             |                 |
| Theta range for data collection   | 4.39 to 71.19°.                                |                 |
| Index ranges                      | 0 ≤ h ≤ 6, -9 ≤ k ≤ 9, -24 ≤ l ≤ 24            |                 |
| Reflections collected             | 8951                                           |                 |
| Independent reflections           | 2294 [R(int) = 0.1640]                         |                 |
| Completeness to theta = 71.19°    | 85.5 %                                         |                 |
| Absorption correction             | Semi-empirical from equivalents                |                 |
| Max. and min. transmission        | 1.0000 and 0.1337                              |                 |
| Refinement method                 | Full-matrix least-squares on F <sup>2</sup>    |                 |
| Data / restraints / parameters    | 2294 / 1 / 196                                 |                 |
| Goodness-of-fit on F <sup>2</sup> | 1.071                                          |                 |
| Final R indices [I > 2σ(I)]       | R1 = 0.0882, wR2 = 0.2253                      |                 |
| R indices (all data)              | R1 = 0.0975, wR2 = 0.2358                      |                 |
| Absolute structure parameter      | 0.5(7)                                         |                 |
| Largest diff. peak and hole       | 0.274 and -0.339 e.Å <sup>-3</sup>             |                 |



ORTEP of tanikolide seco acid **2** with 50% displacement ellipsoids

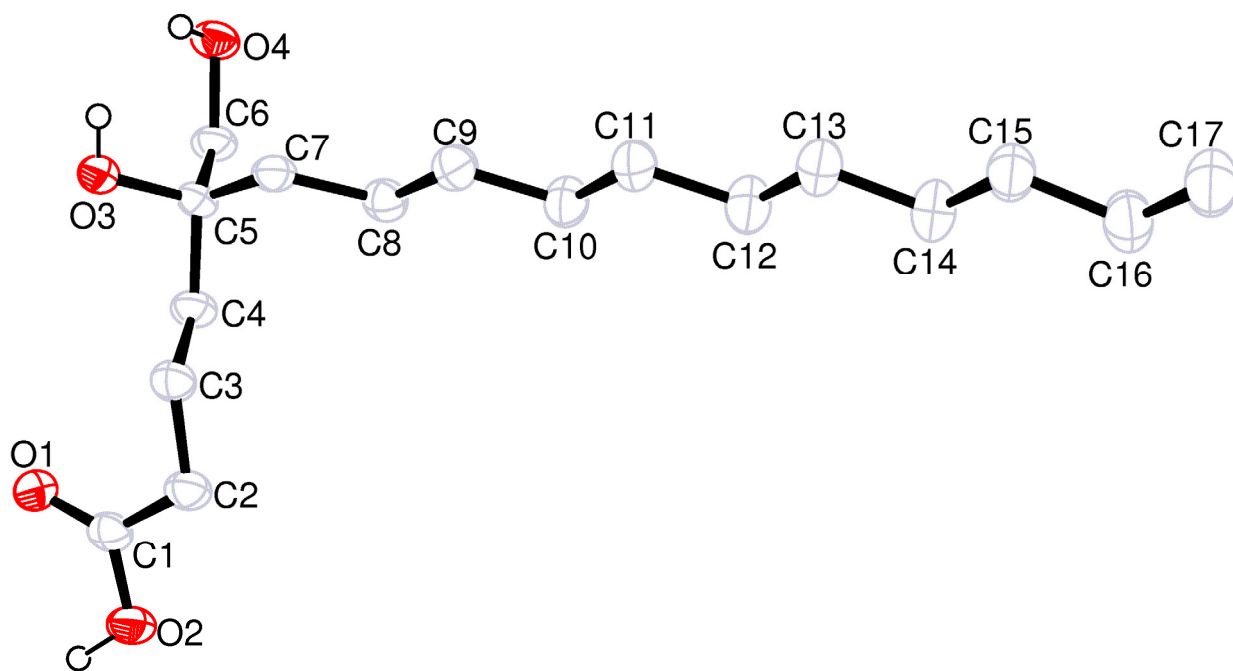

400 MHz  $^1\text{H}$  NMR of compound **3** in  $\text{CDCl}_3$

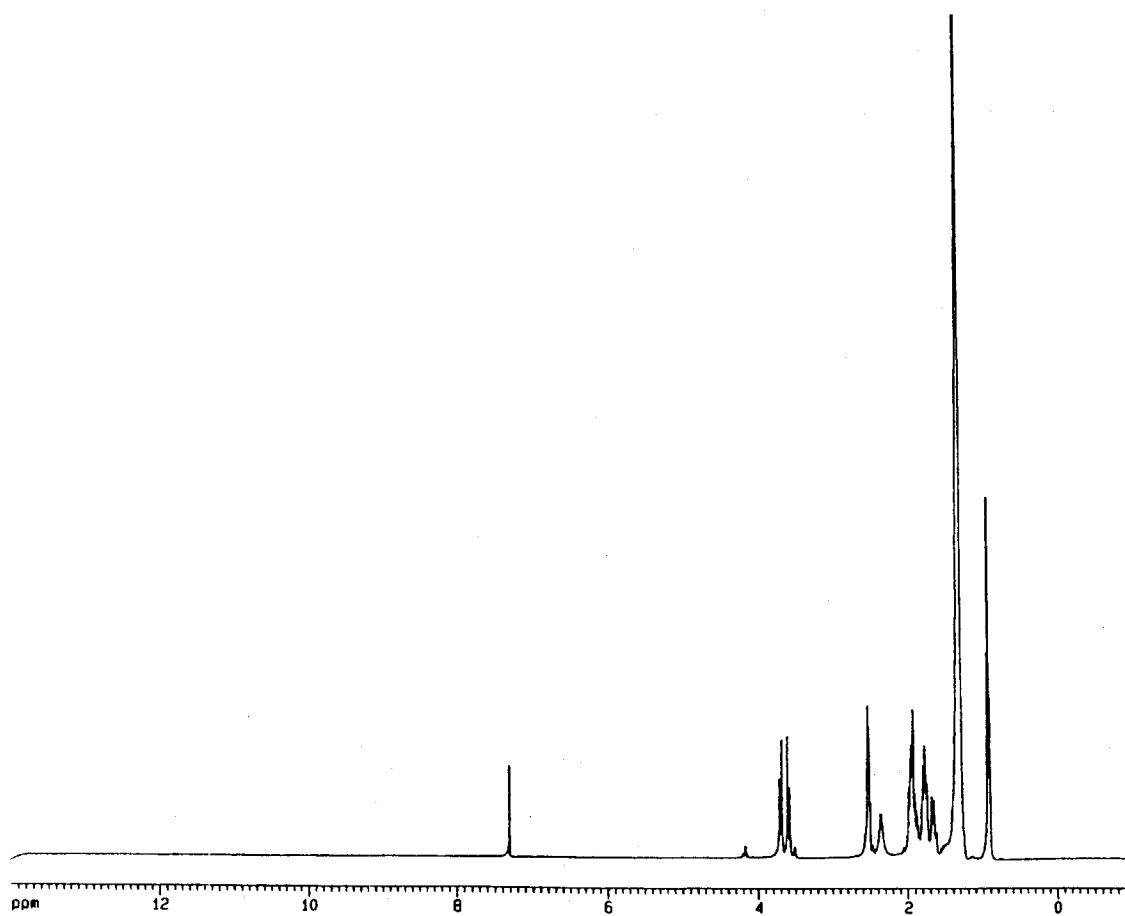

100 MHz  $^{13}\text{C}$  NMR of compound **3** in  $\text{CDCl}_3$

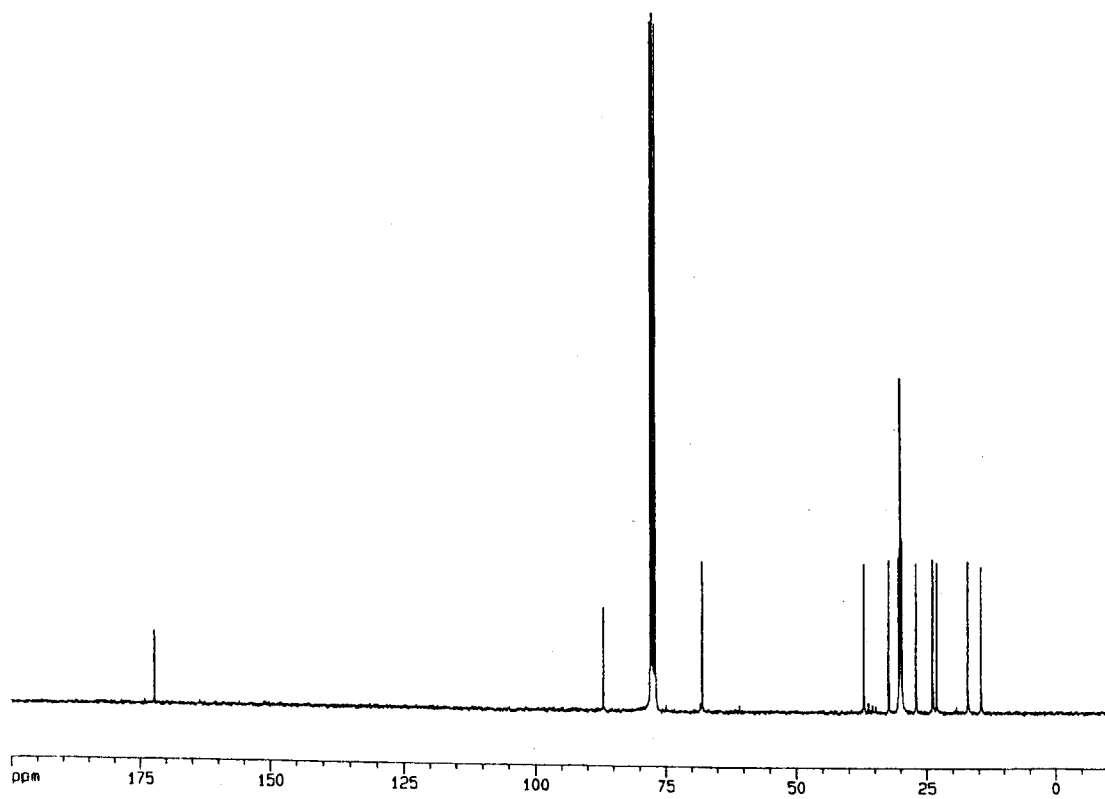

100 MHz DEPT 135 spectrum of compound **3** in CDCl<sub>3</sub>

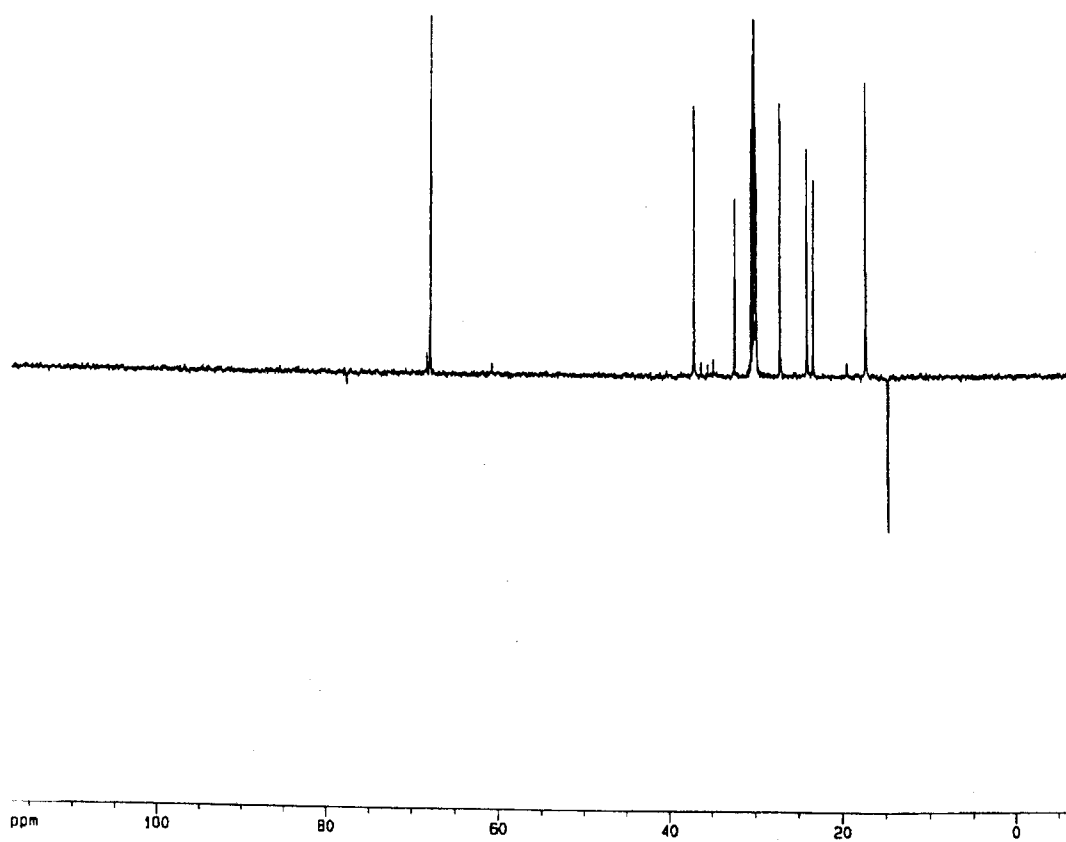

400 MHz  $^1\text{H}$ - $^1\text{H}$  COSY spectrum of compound **3** in  $\text{CDCl}_3$

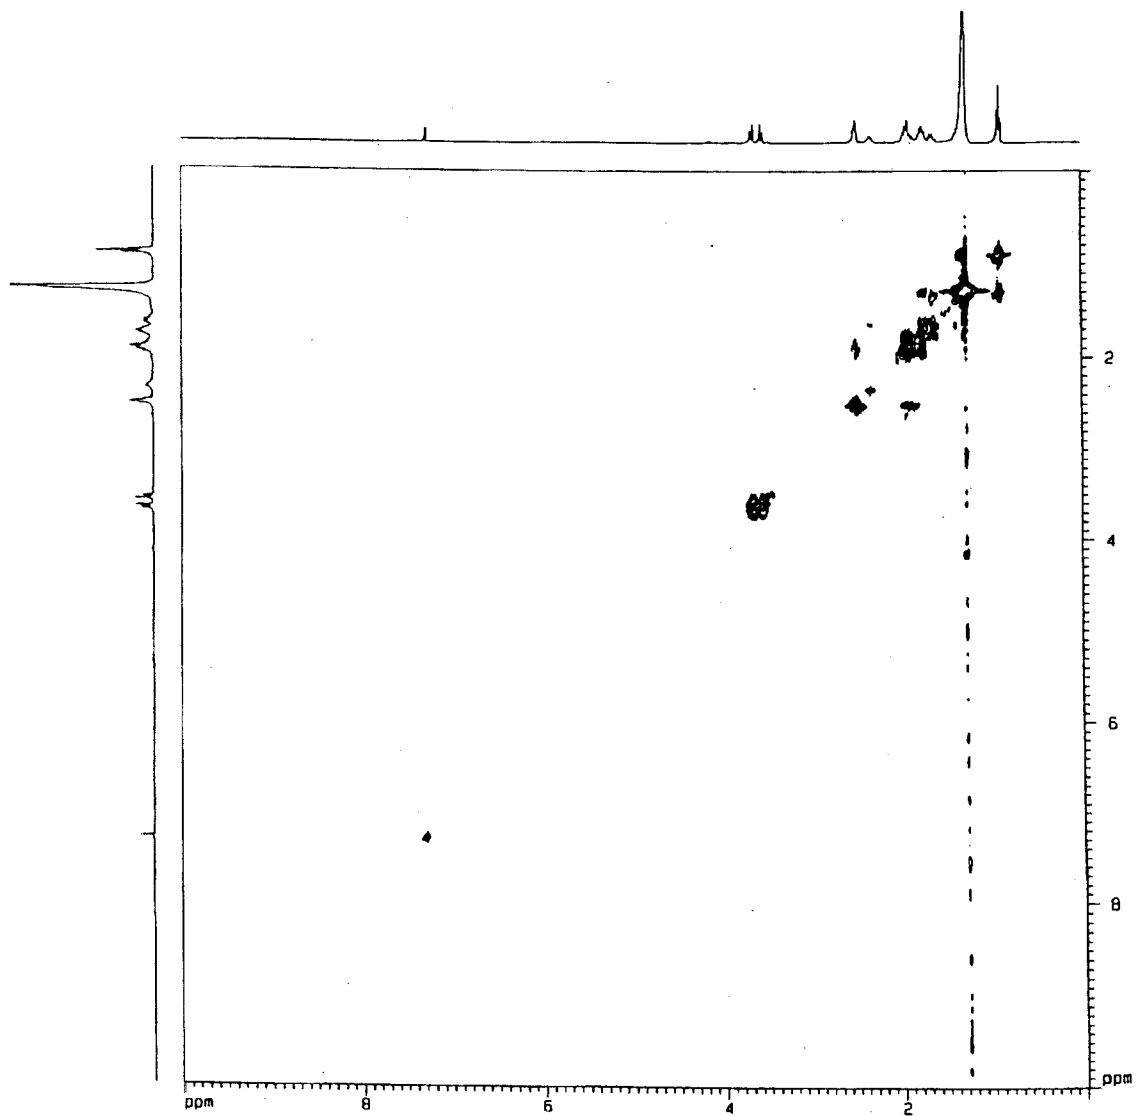

400 MHz Multi-edited HSQC spectrum of compound 3 in CDCl<sub>3</sub>

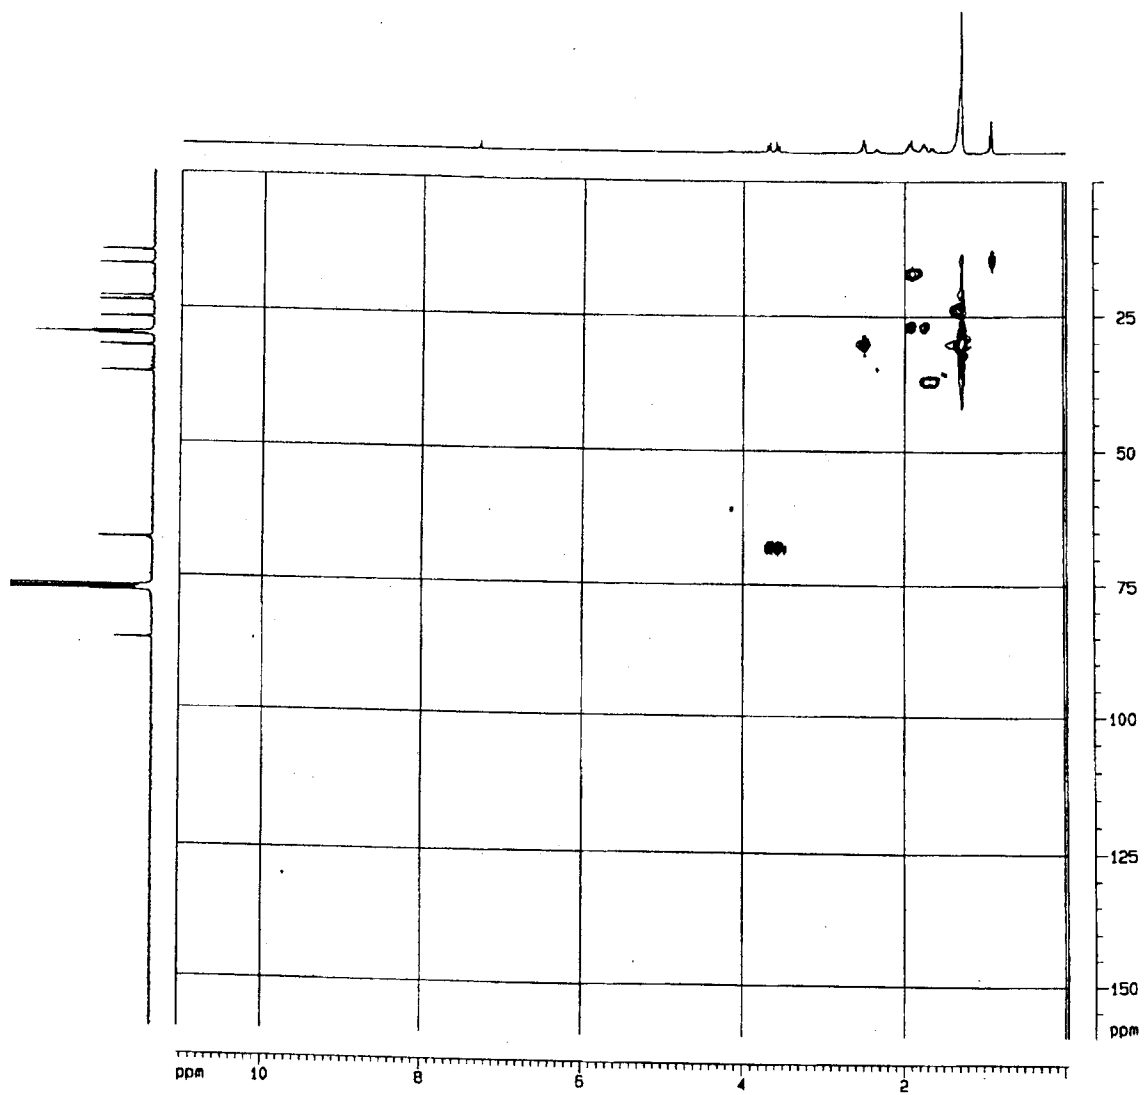

400 MHz HMBC spectrum of compound **3** in CDCl<sub>3</sub> optimized for  $J = 8$  Hz

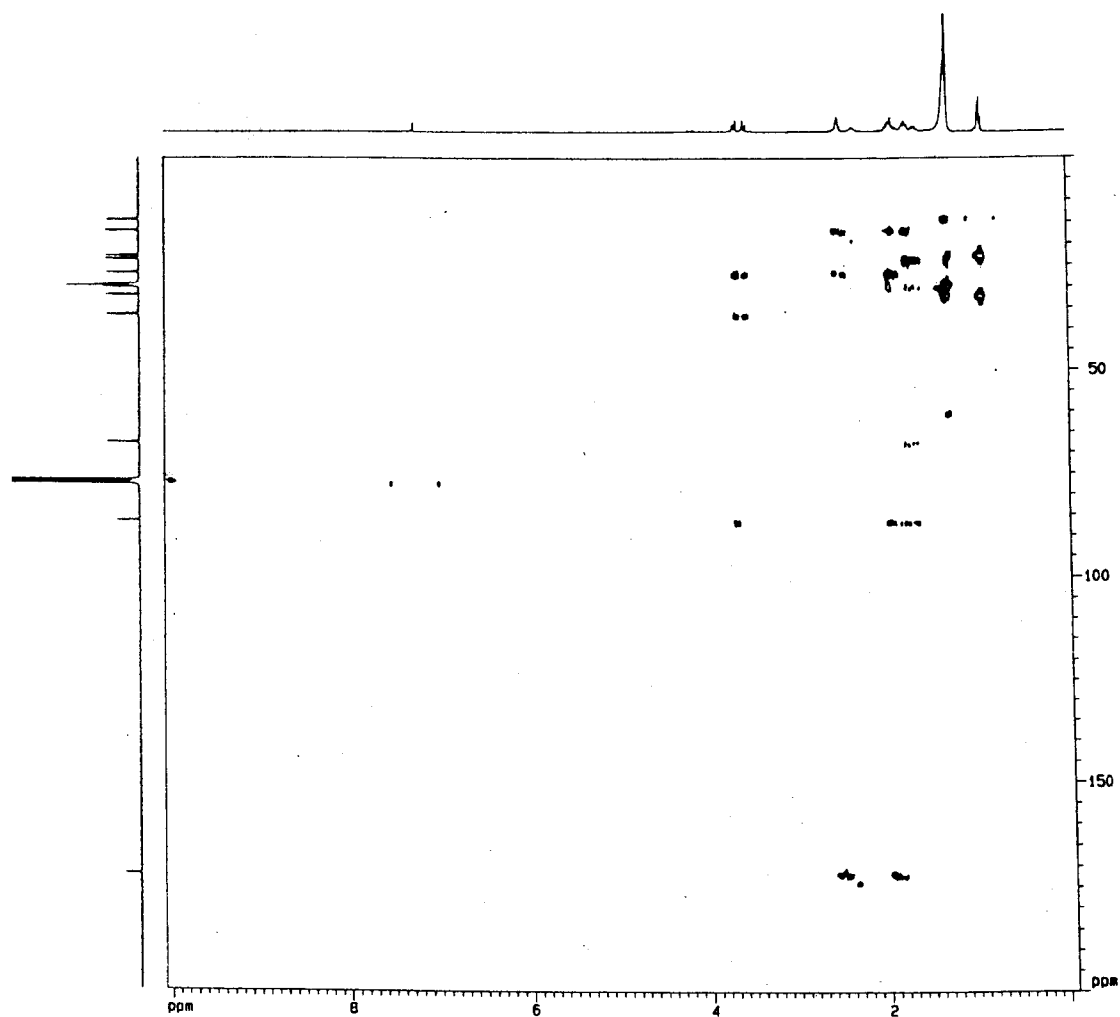

LR TOF MS ES+ spectrum of compound 3

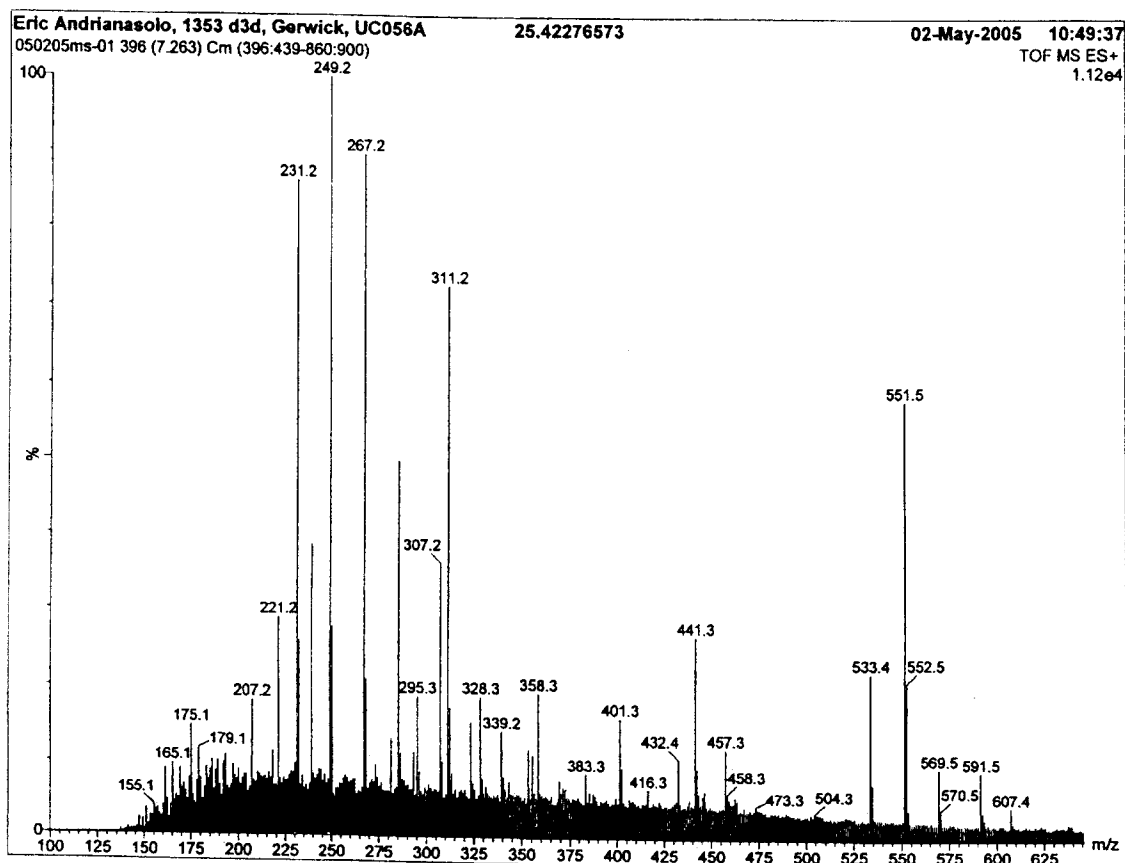



LR FAB (otg matrix) spectrum of compound 3

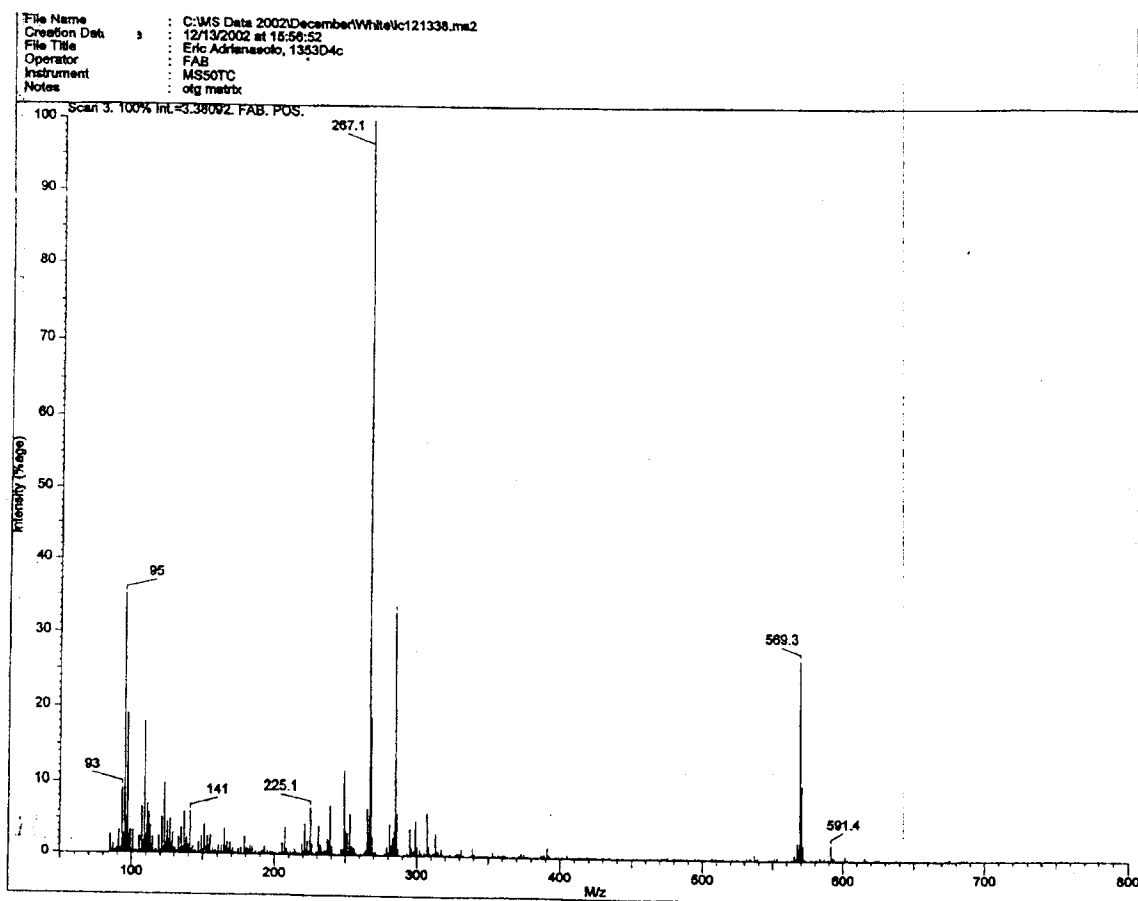

LR FAB (nba matrix) spectrum of compound 3

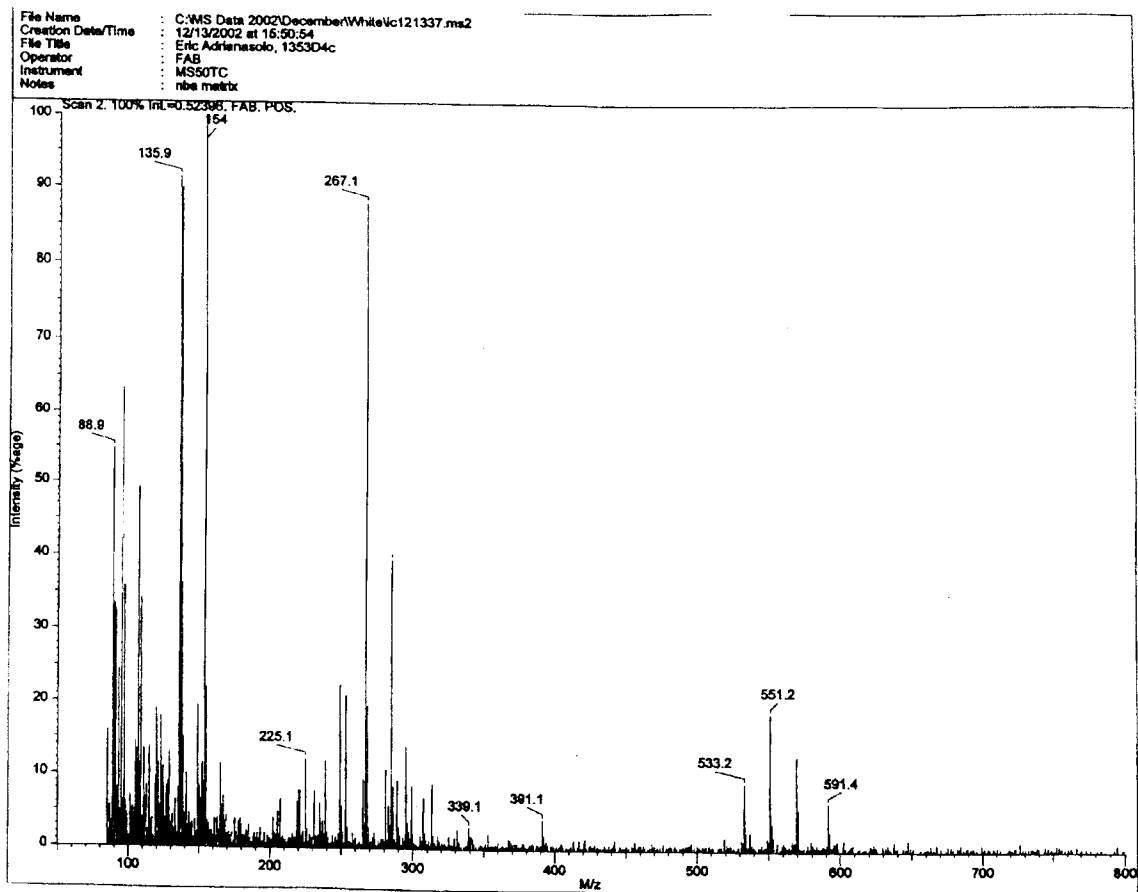

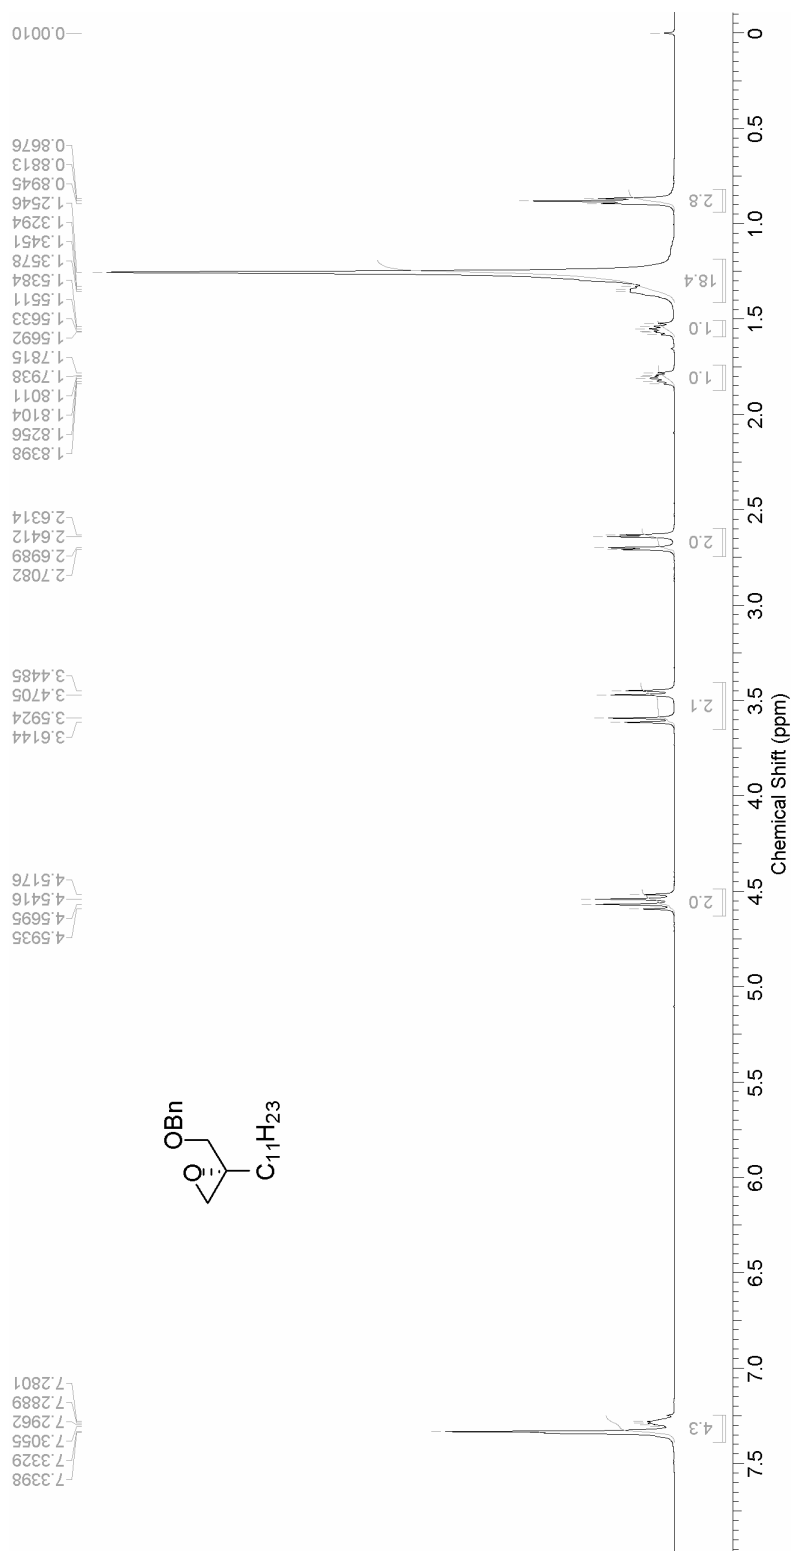

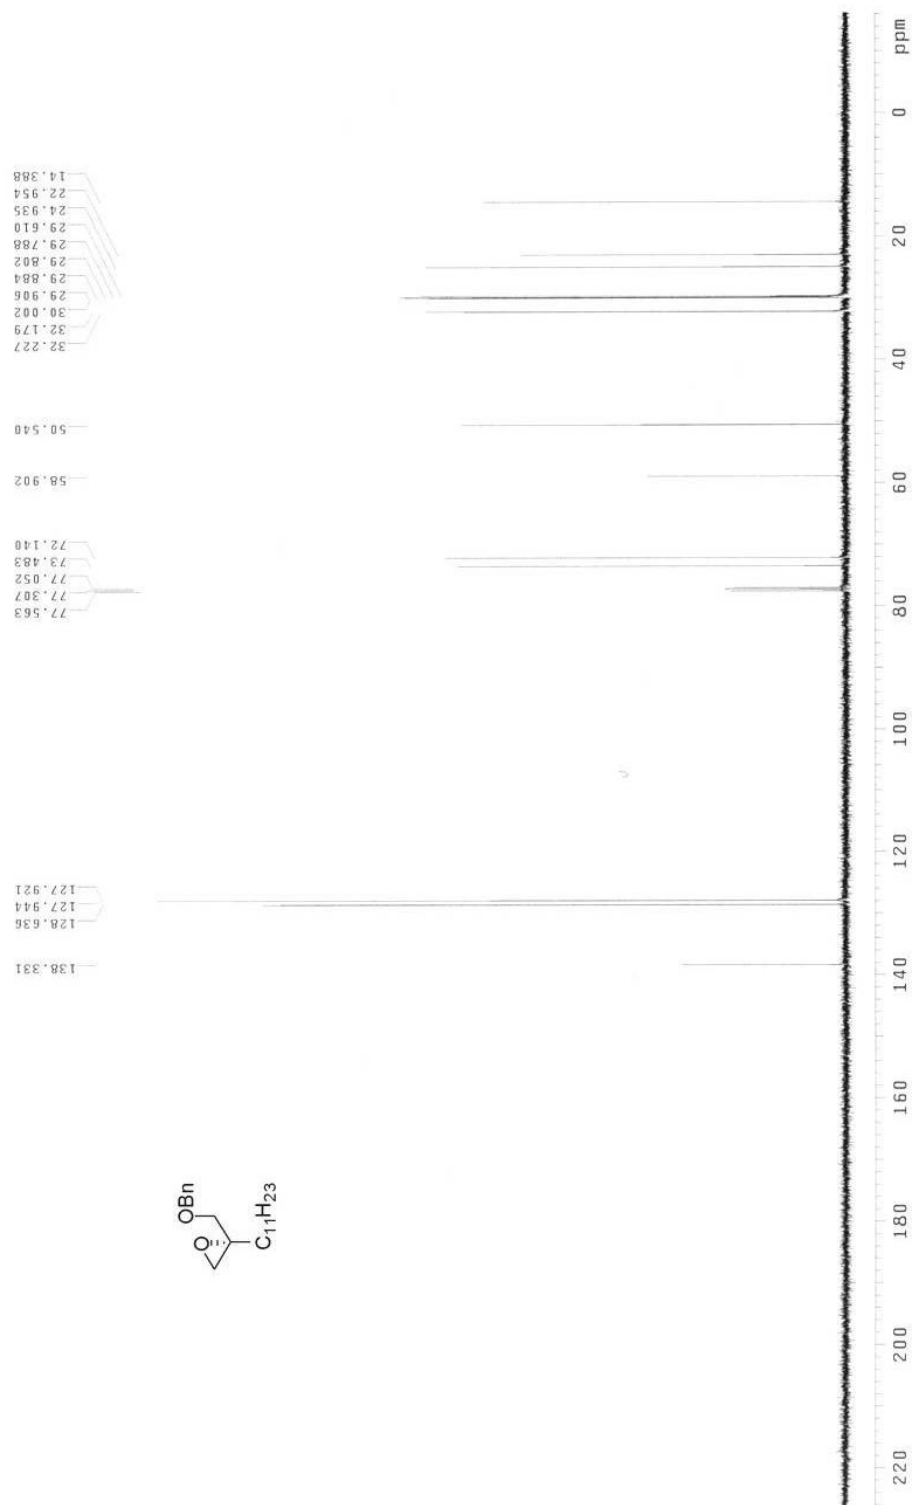

$^{13}\text{C}$ -NMR (125 MHz,  $\text{CDCl}_3$ ) of the benzyl ether of epoxide 6

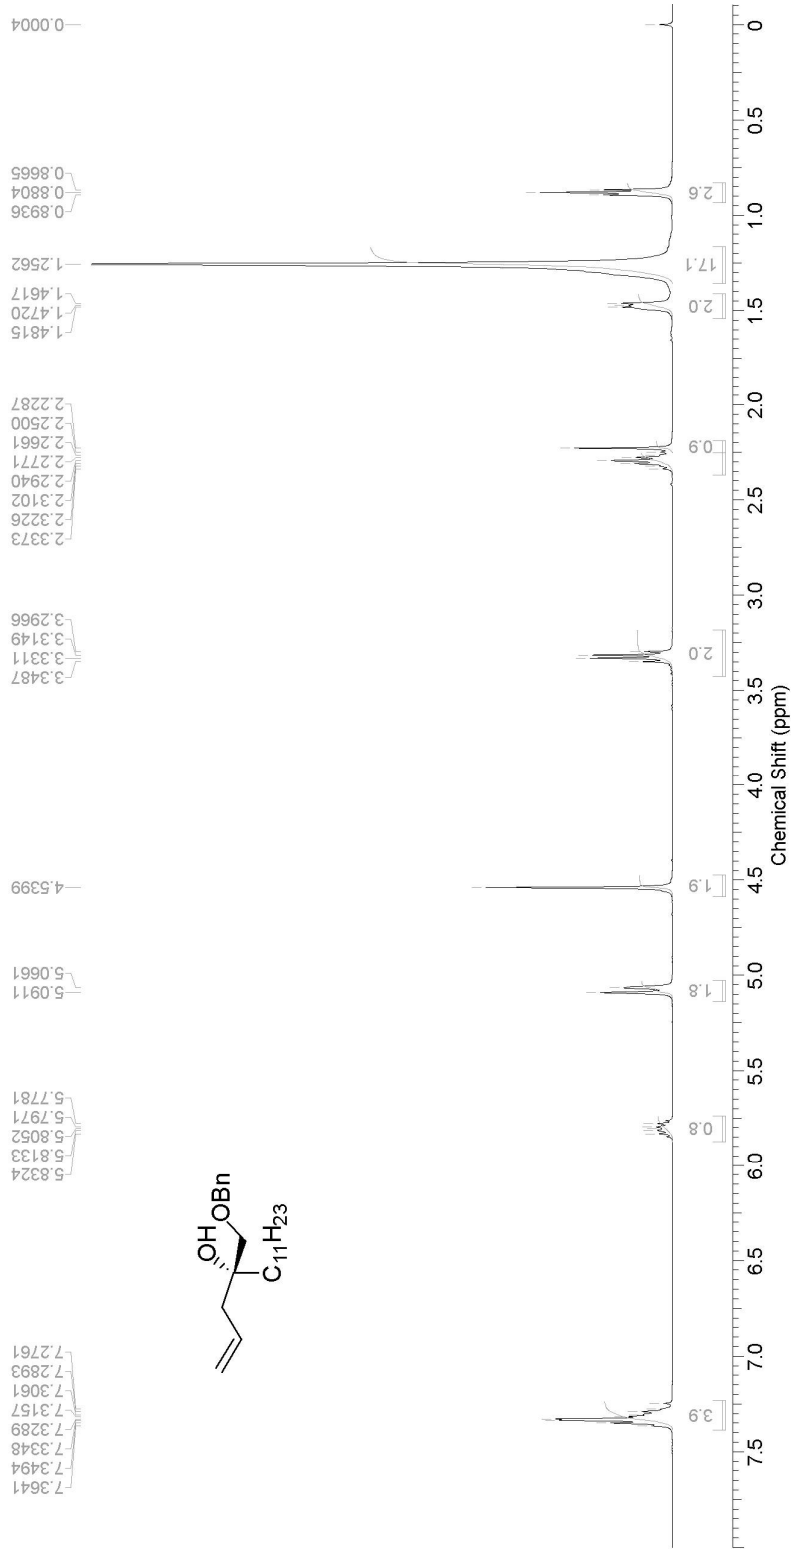

$^1\text{H-NMR}$  (500 MHz,  $\text{CDCl}_3$ ) of 7

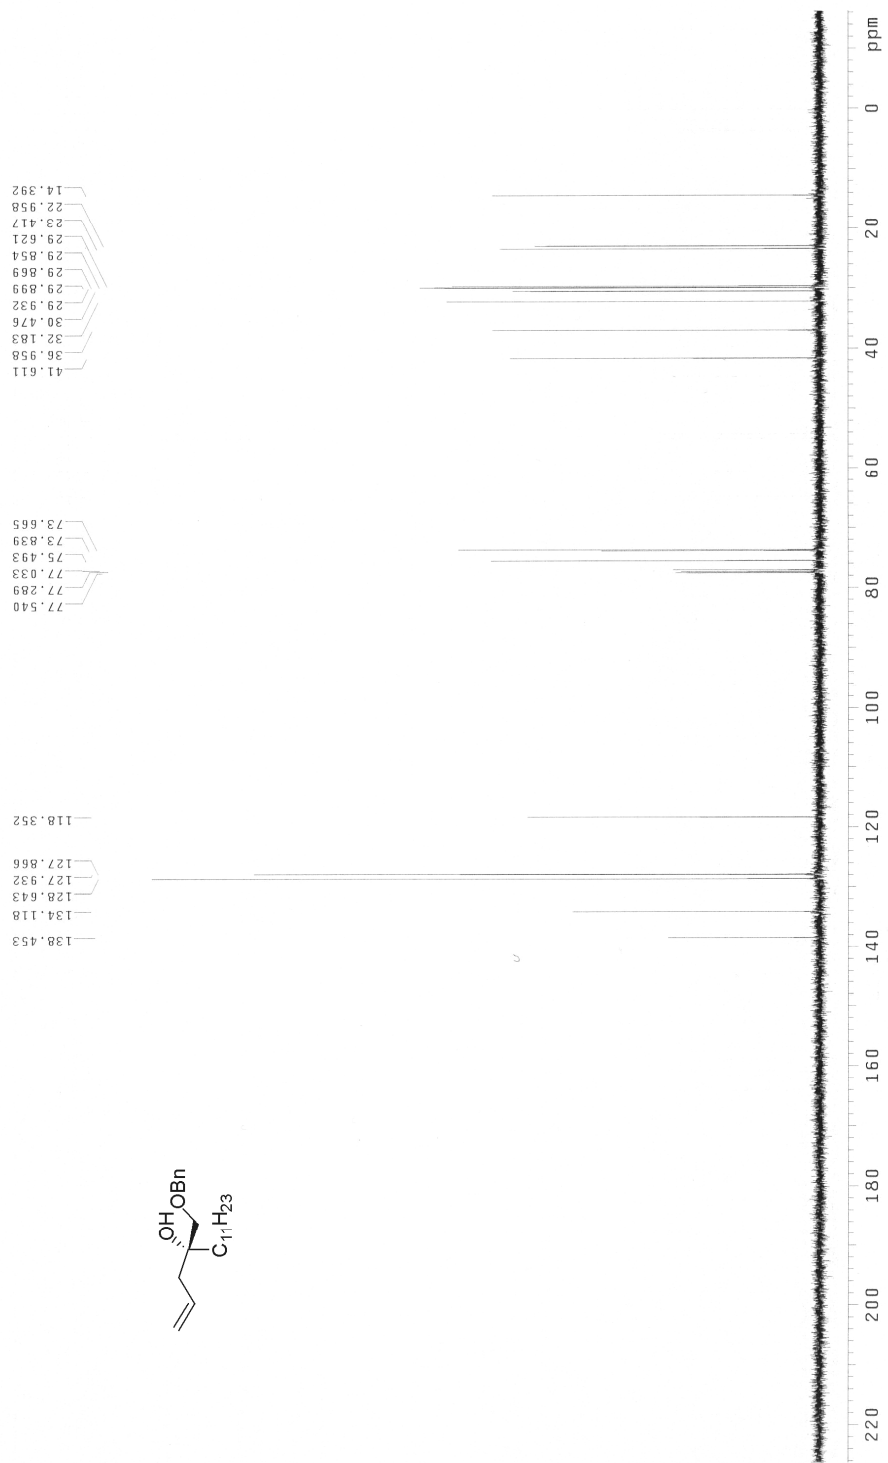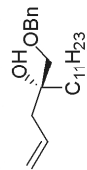

<sup>13</sup>C-NMR (125 MHz, CDCl<sub>3</sub>) of 7

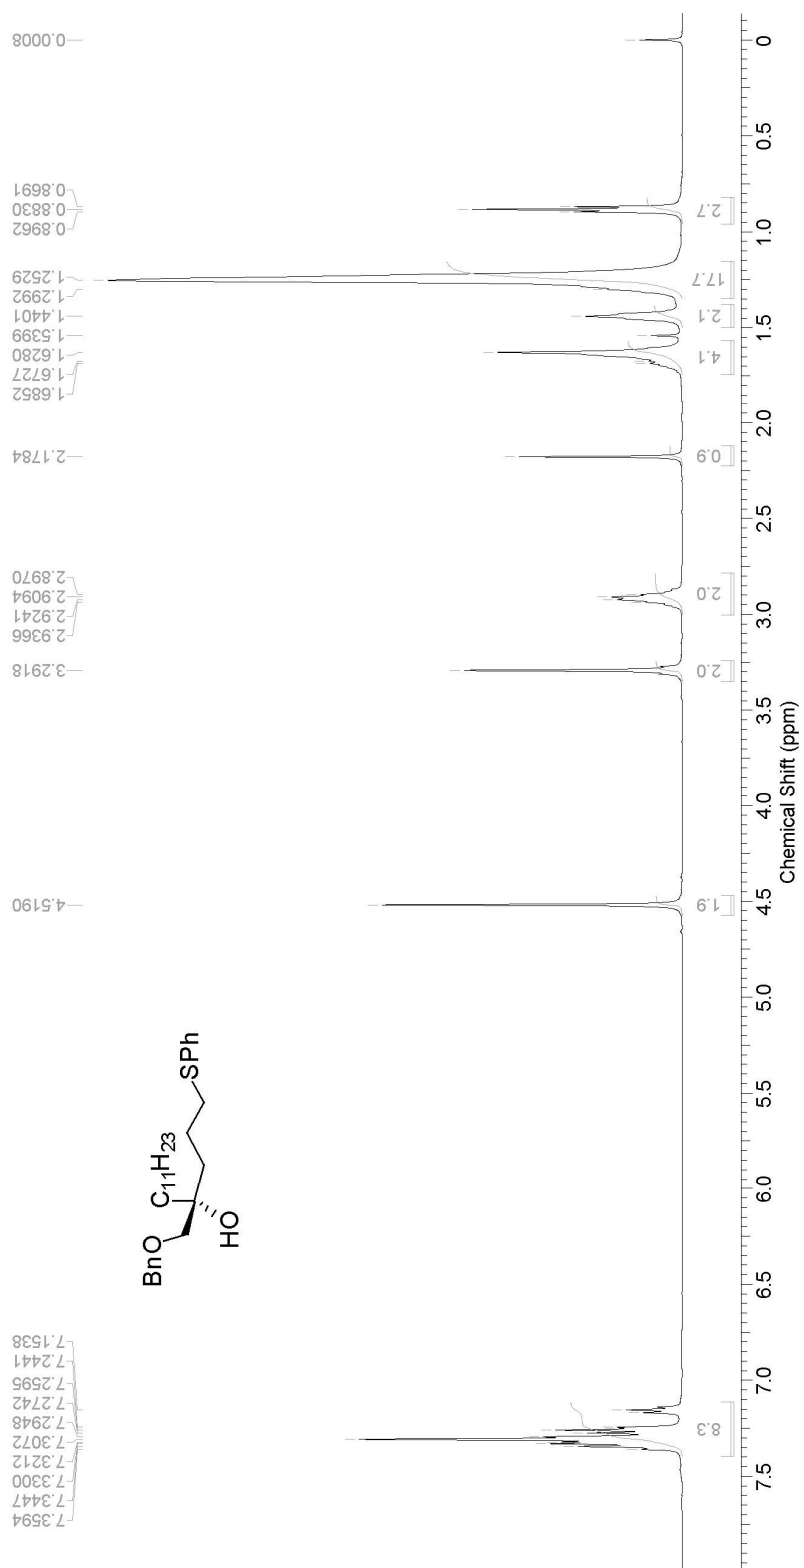

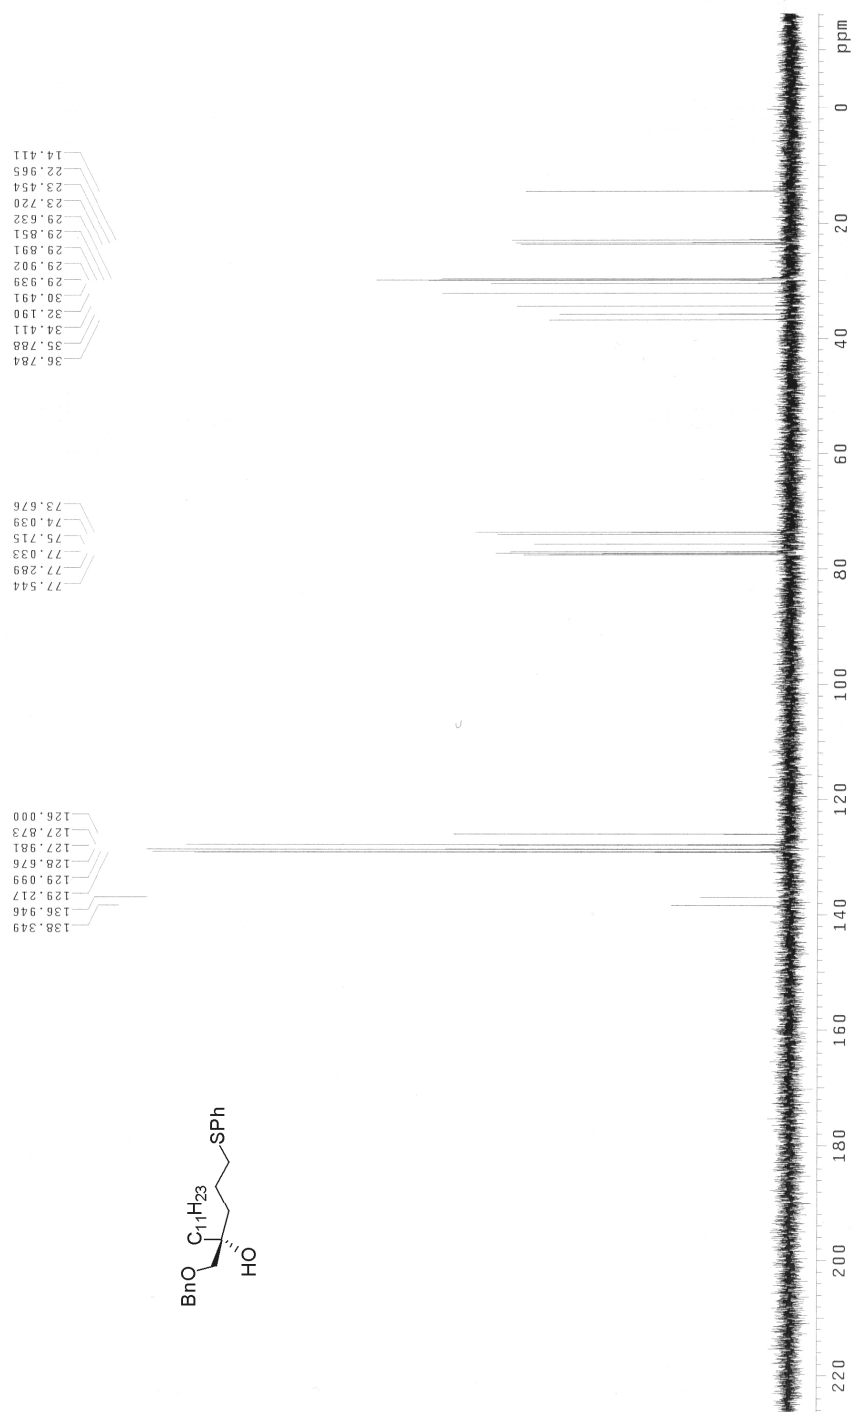

$^{13}\text{C-NMR}$  (125 MHz,  $\text{CDCl}_3$ ) of sulfide derivative of 7



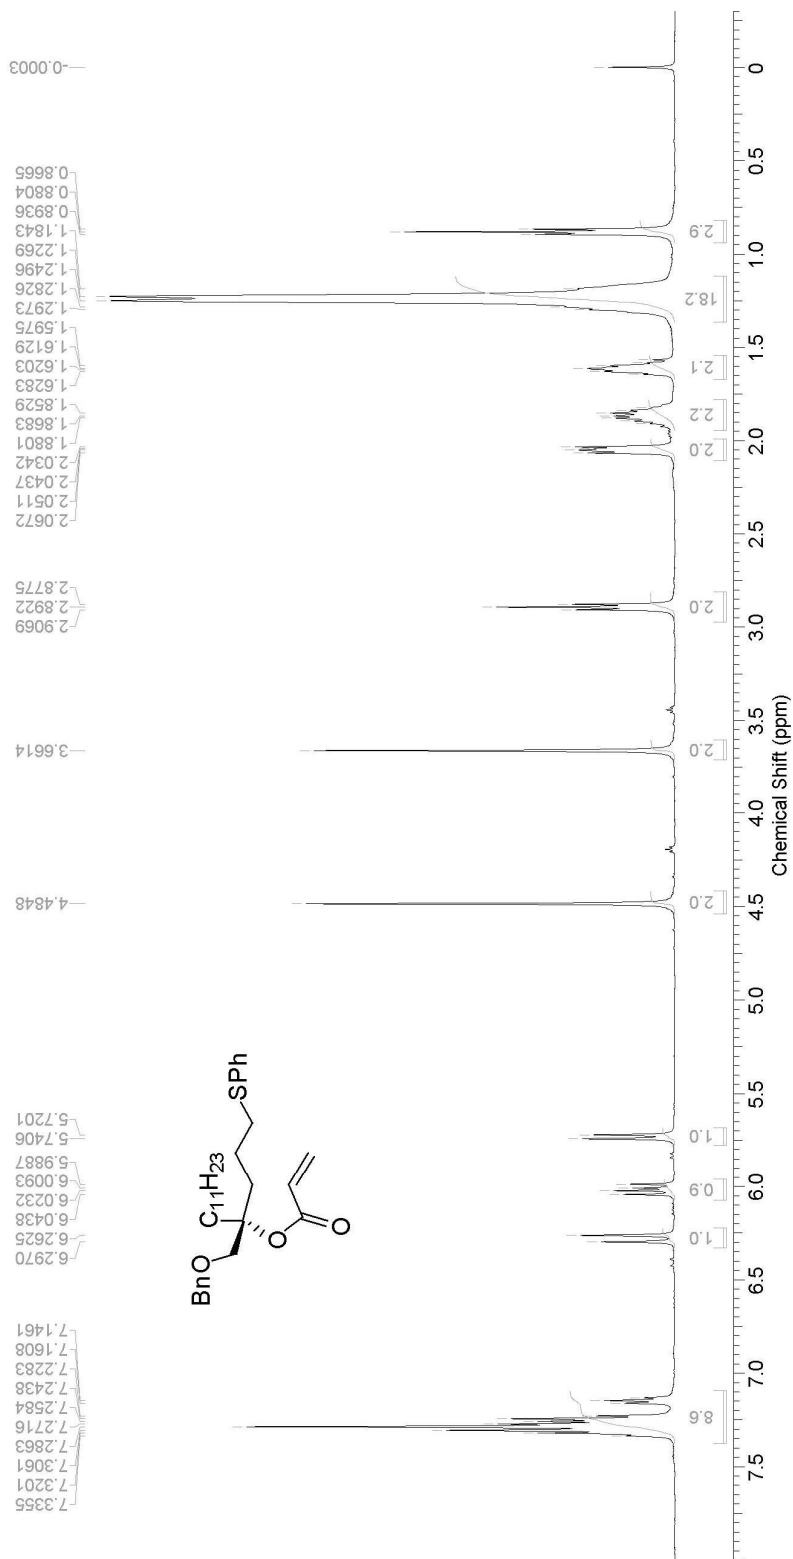

$^1\text{H-NMR}$  (500 MHz,  $\text{CDCl}_3$ ) of **8**

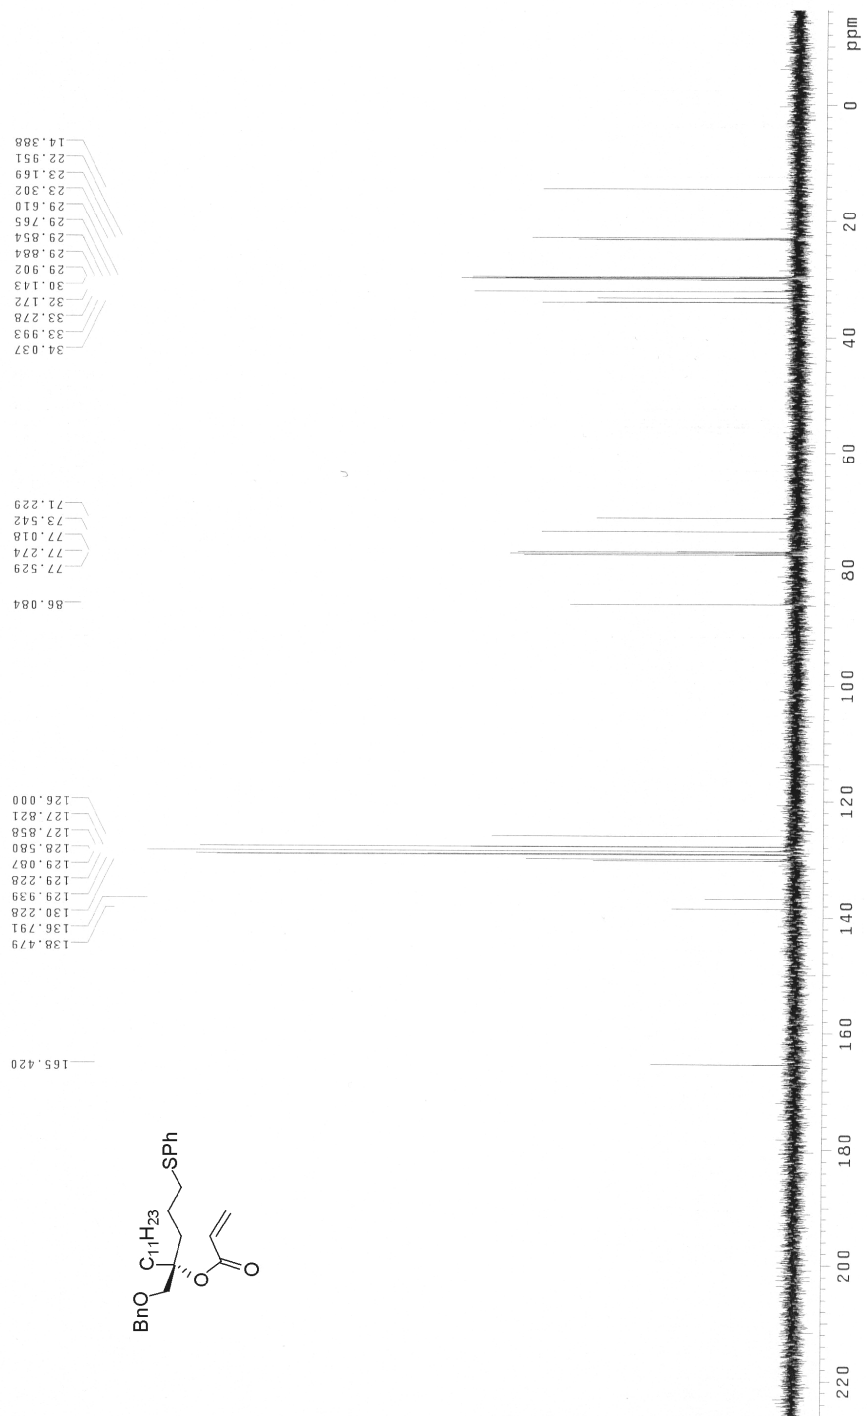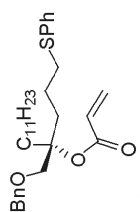

<sup>13</sup>C-NMR (125 MHz, CDCl<sub>3</sub>) of **8**

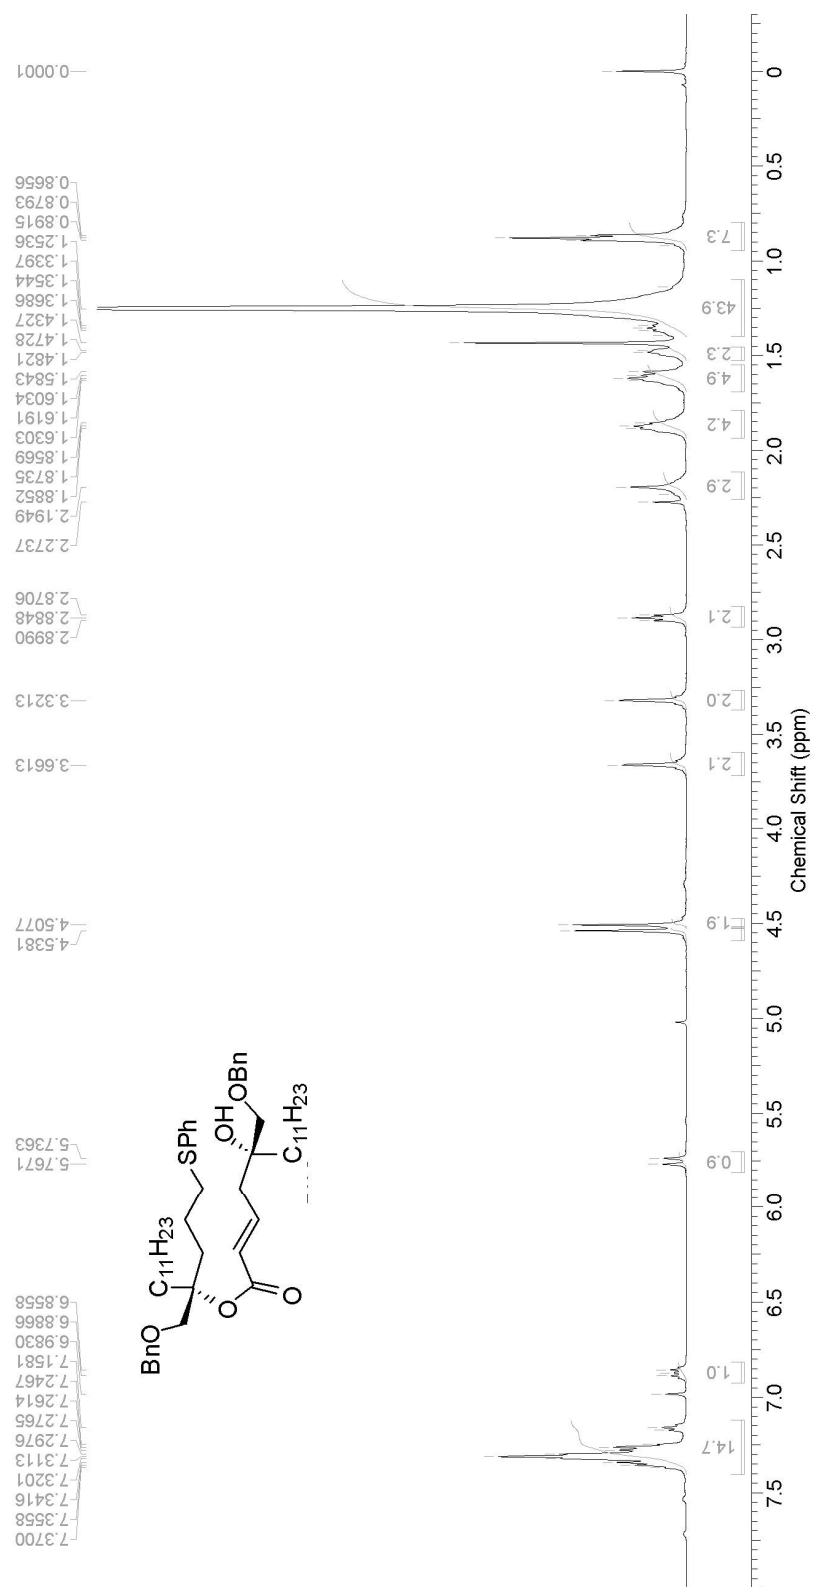

<sup>1</sup>H-NMR (500 MHz, CDCl<sub>3</sub>) of **10**



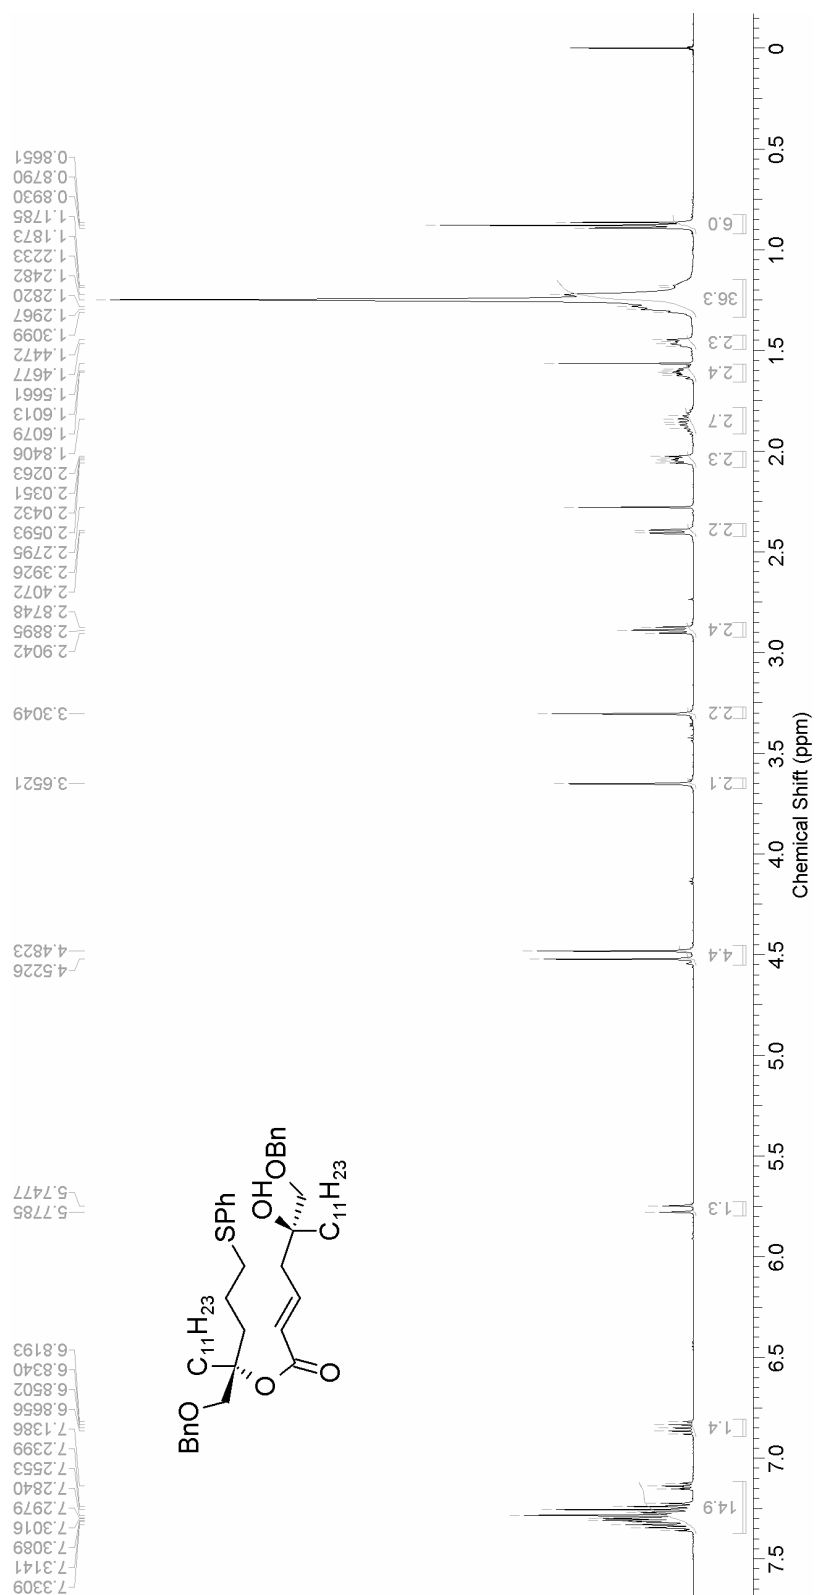

<sup>1</sup>H-NMR (500 MHz, CDCl<sub>3</sub>) of **13**

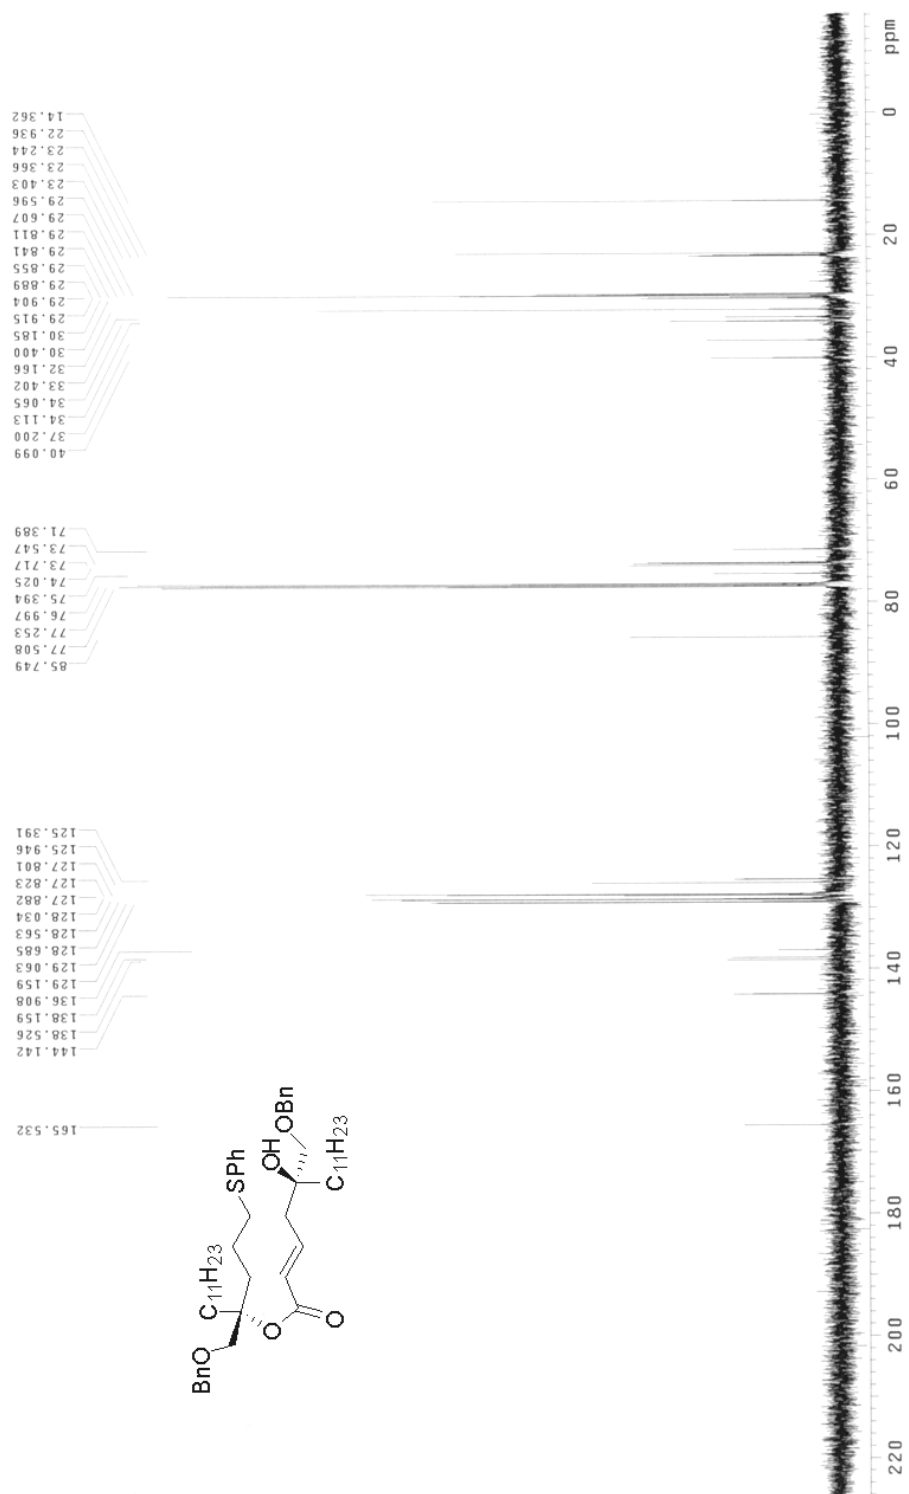

<sup>13</sup>C-NMR (125 MHz, CDCl<sub>3</sub>) of 13

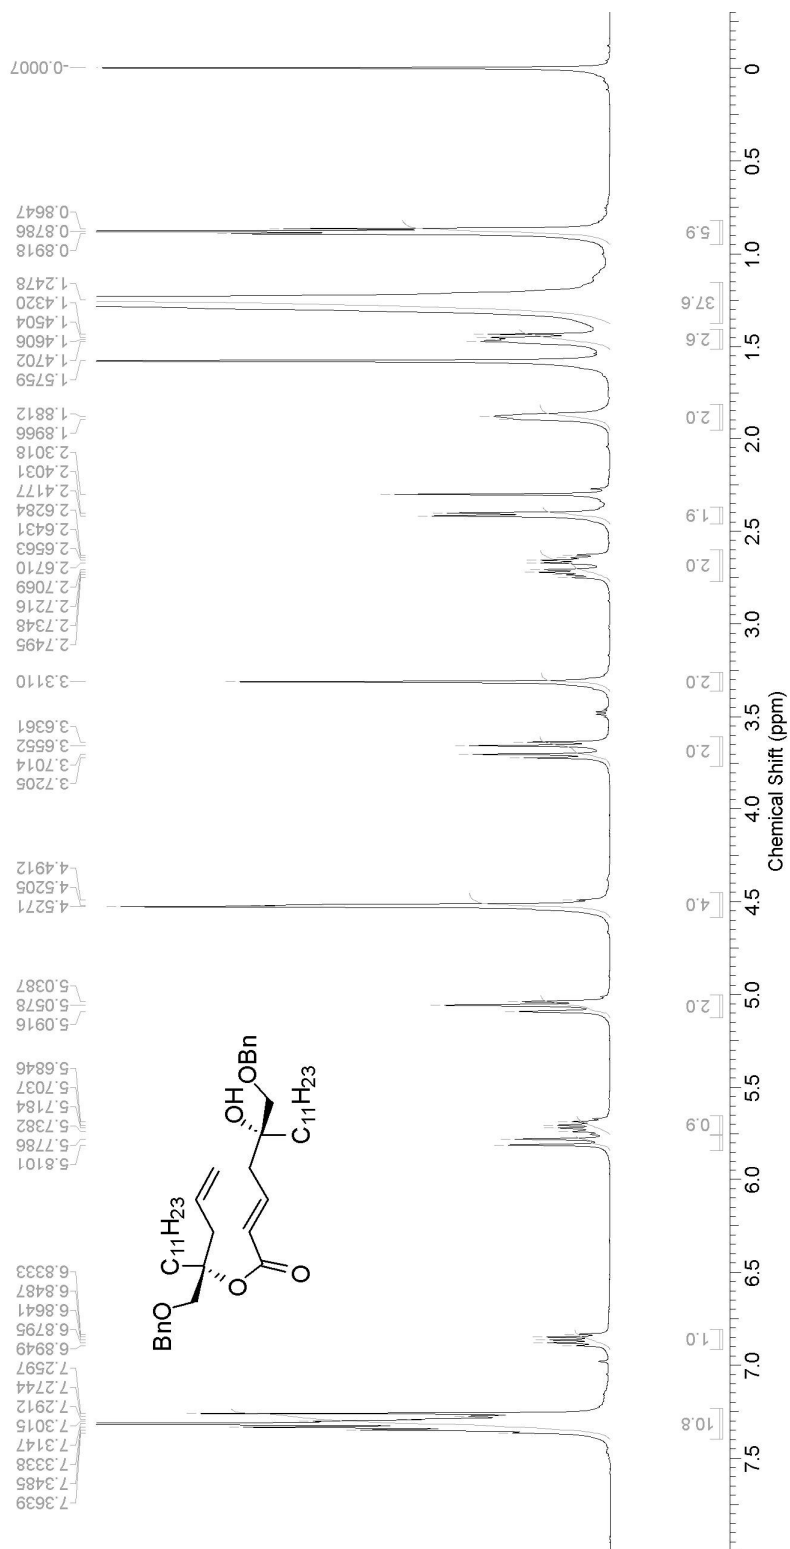

<sup>1</sup>H-NMR (500MHz, CDCl<sub>3</sub>) of diene product of **10**

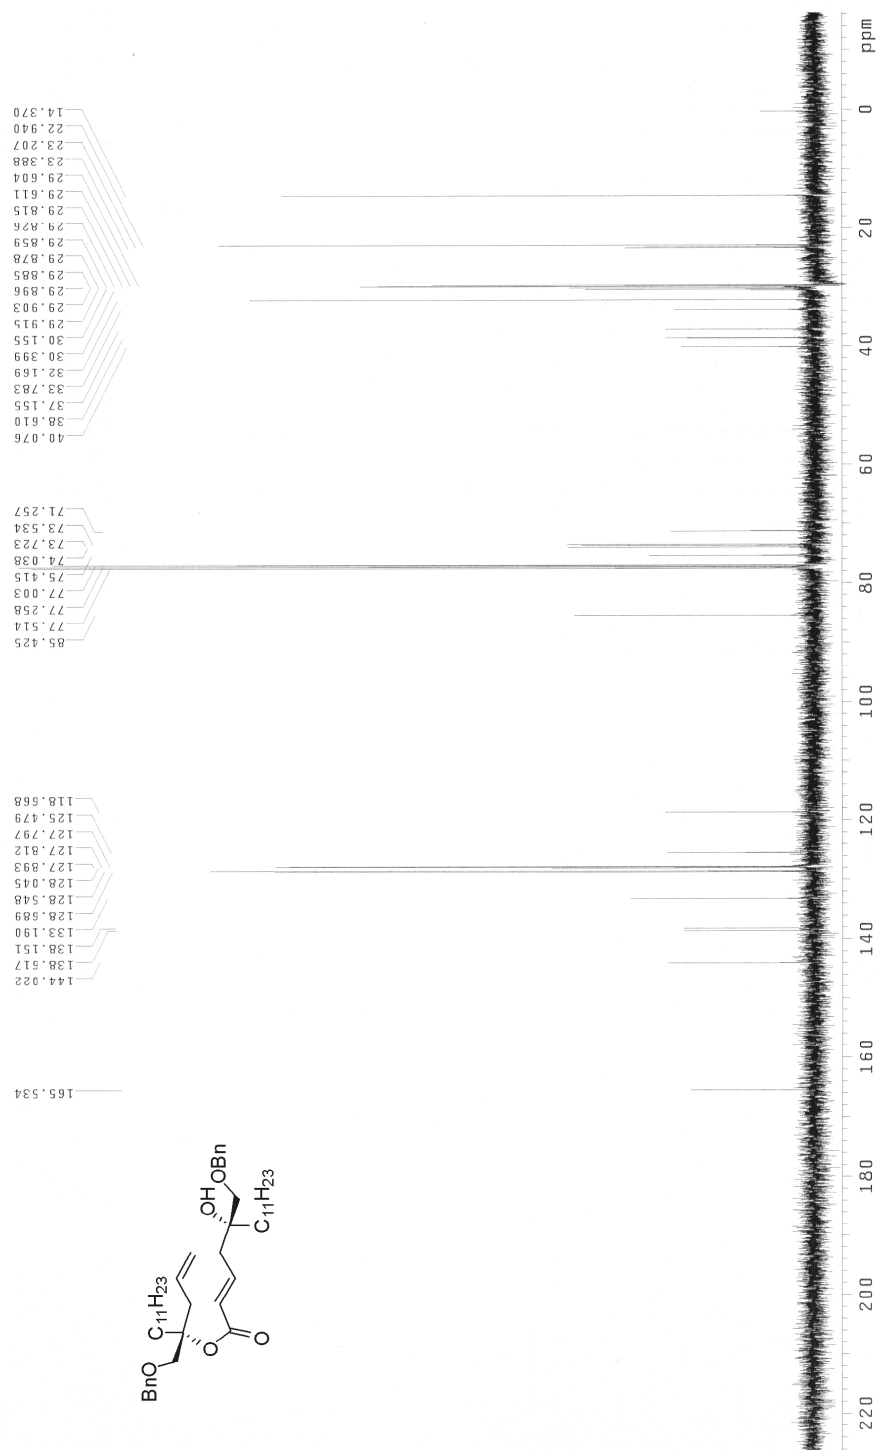

$^{13}\text{C}$ -NMR (125 MHz,  $\text{CDCl}_3$ ) of diene product of **10**



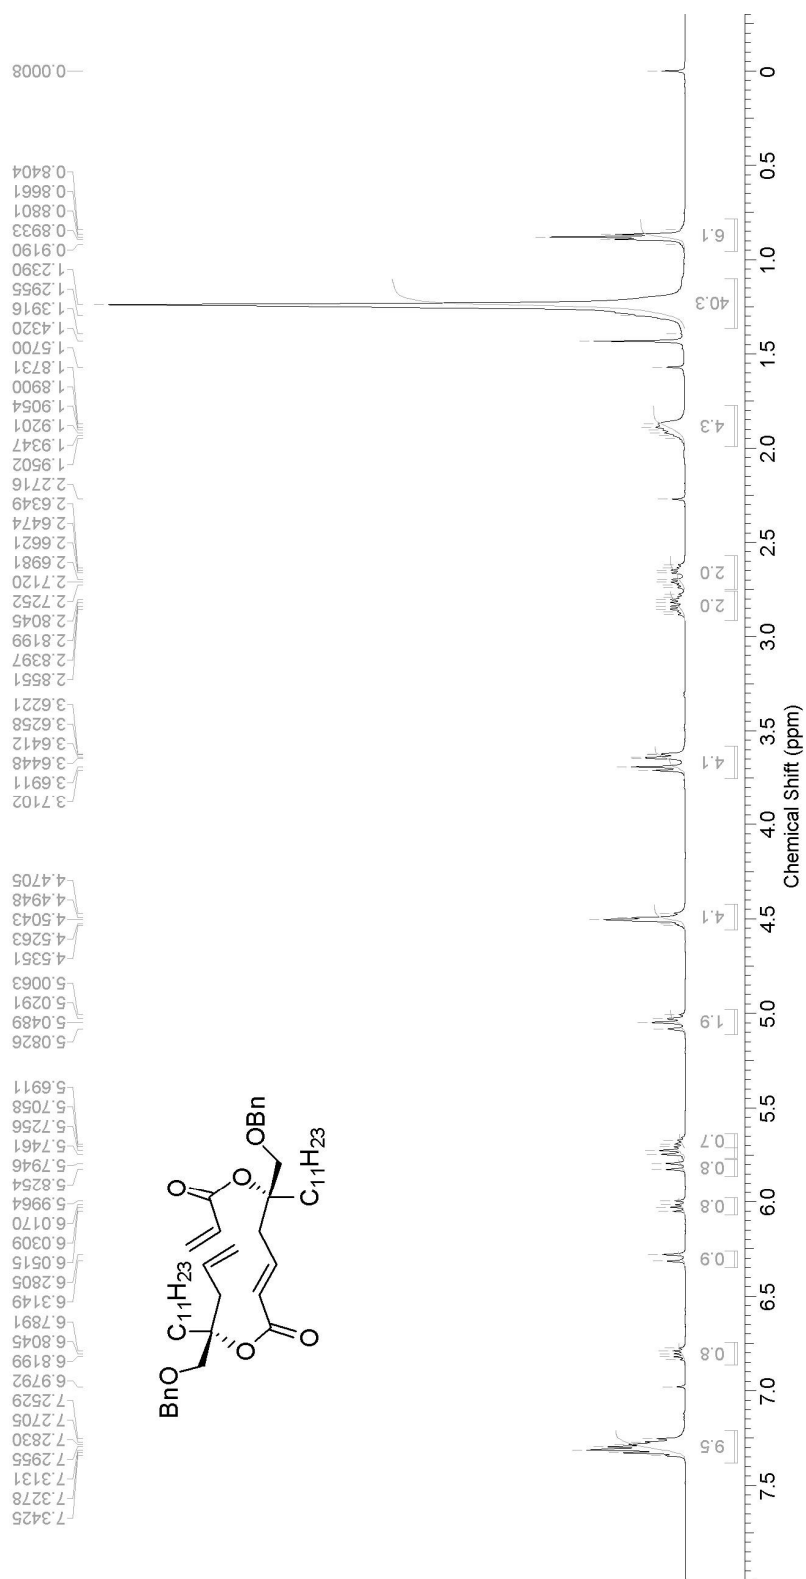

$^1H$ -NMR (500 MHz,  $CDCl_3$ ) of **11**

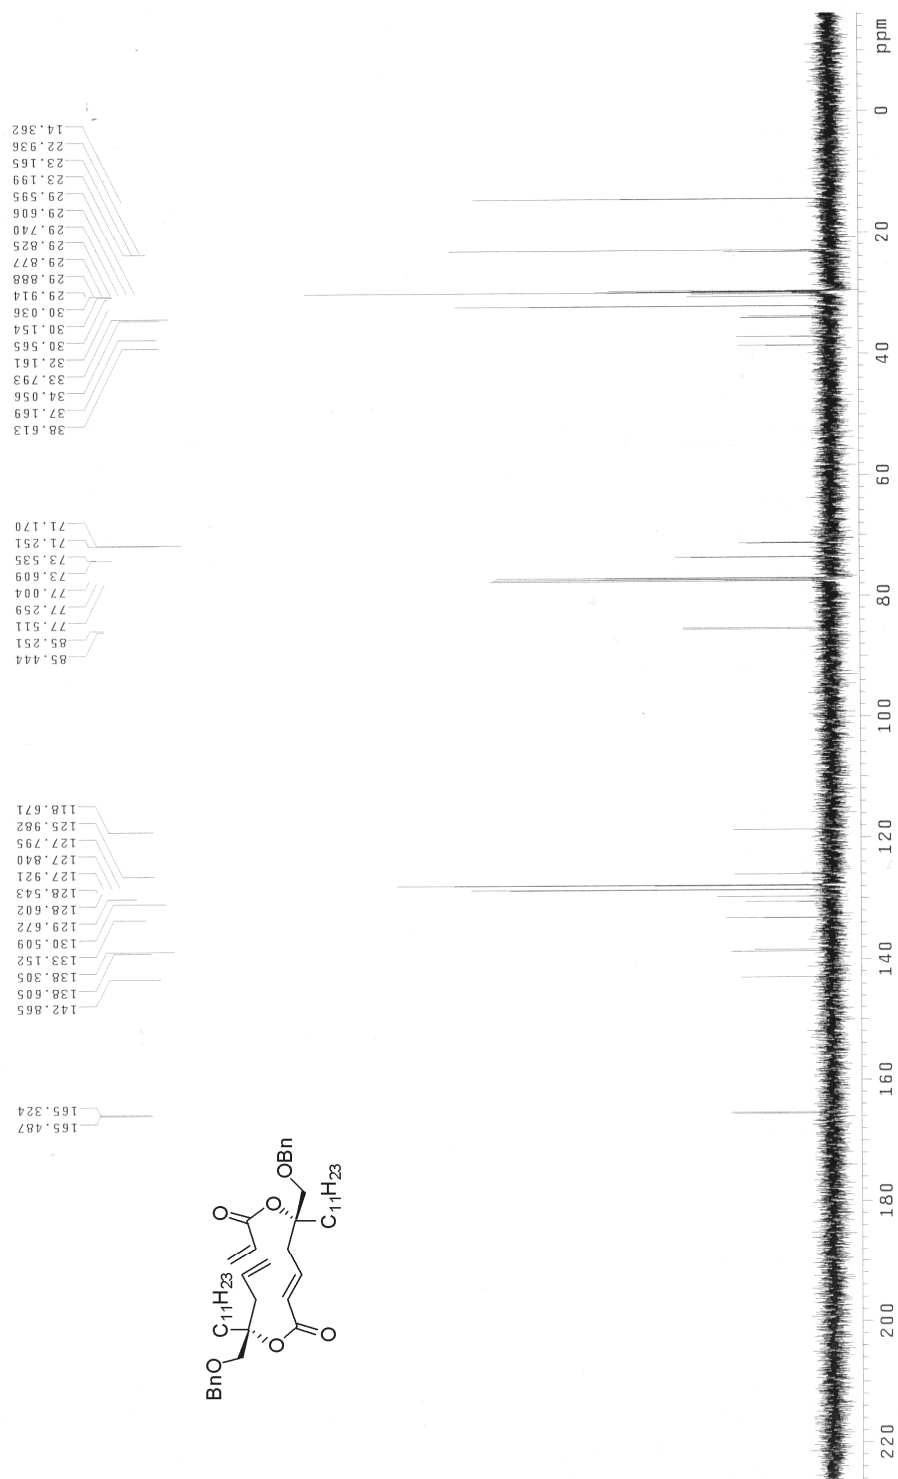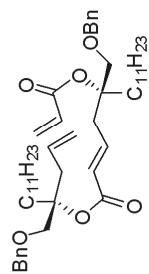

$^{13}C$ -NMR (125 MHz,  $CDCl_3$ ) of 11

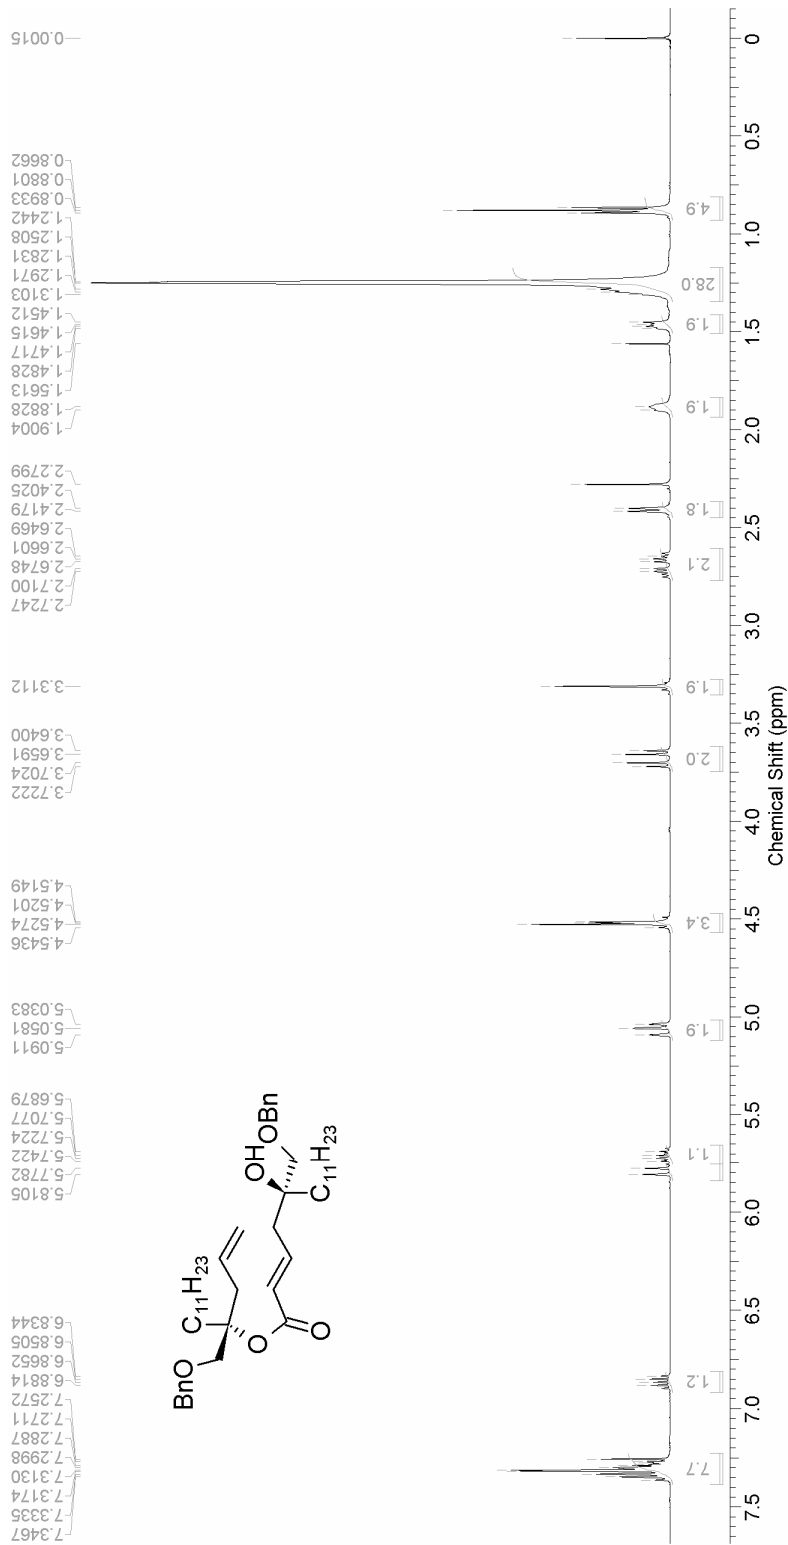

$^1\text{H-NMR}$  (500MHz,  $\text{CDCl}_3$ ) of diene product of **13**

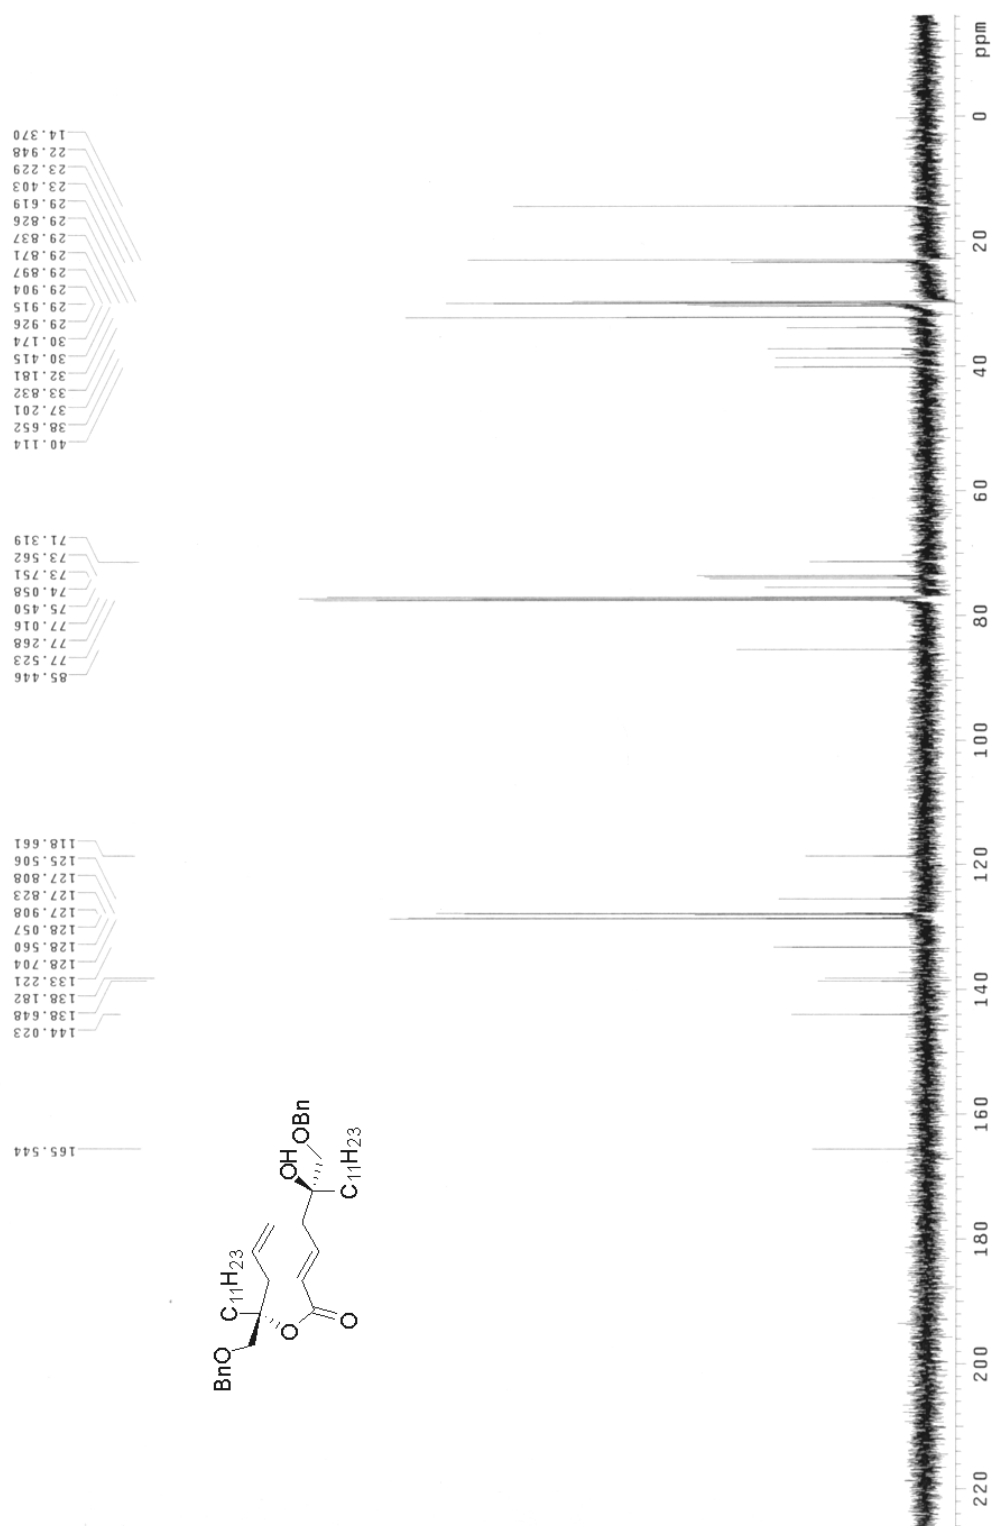

$^{13}\text{C}$ -NMR (125 MHz,  $\text{CDCl}_3$ ) of diene product of **13**

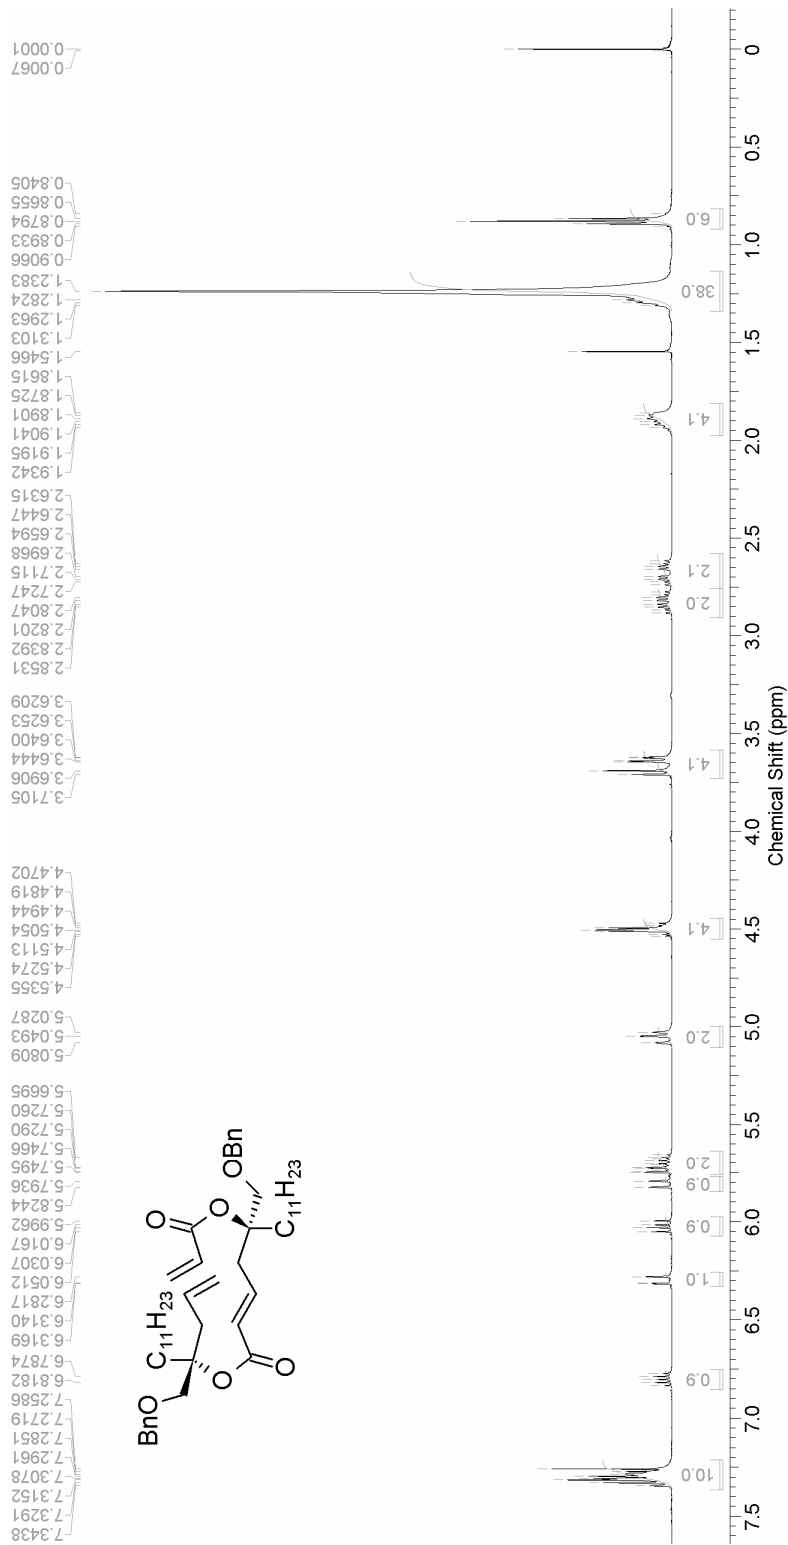

<sup>1</sup>H-NMR (500 MHz, CDCl<sub>3</sub>) of 14

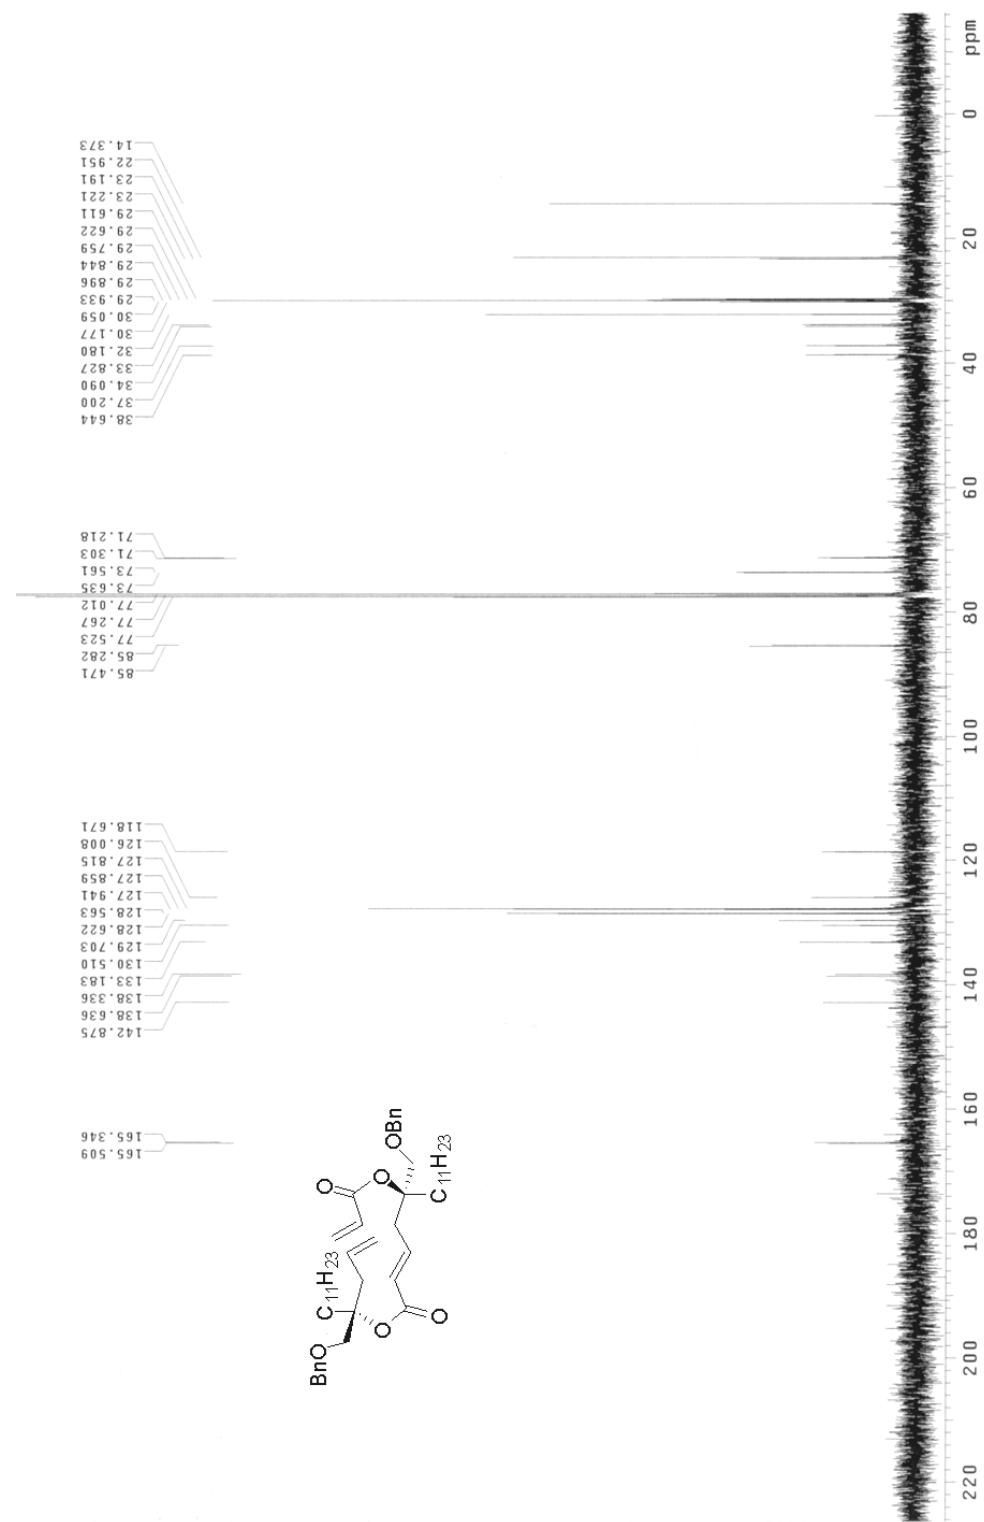

<sup>13</sup>C-NMR (125 MHz, CDCl<sub>3</sub>) of 14

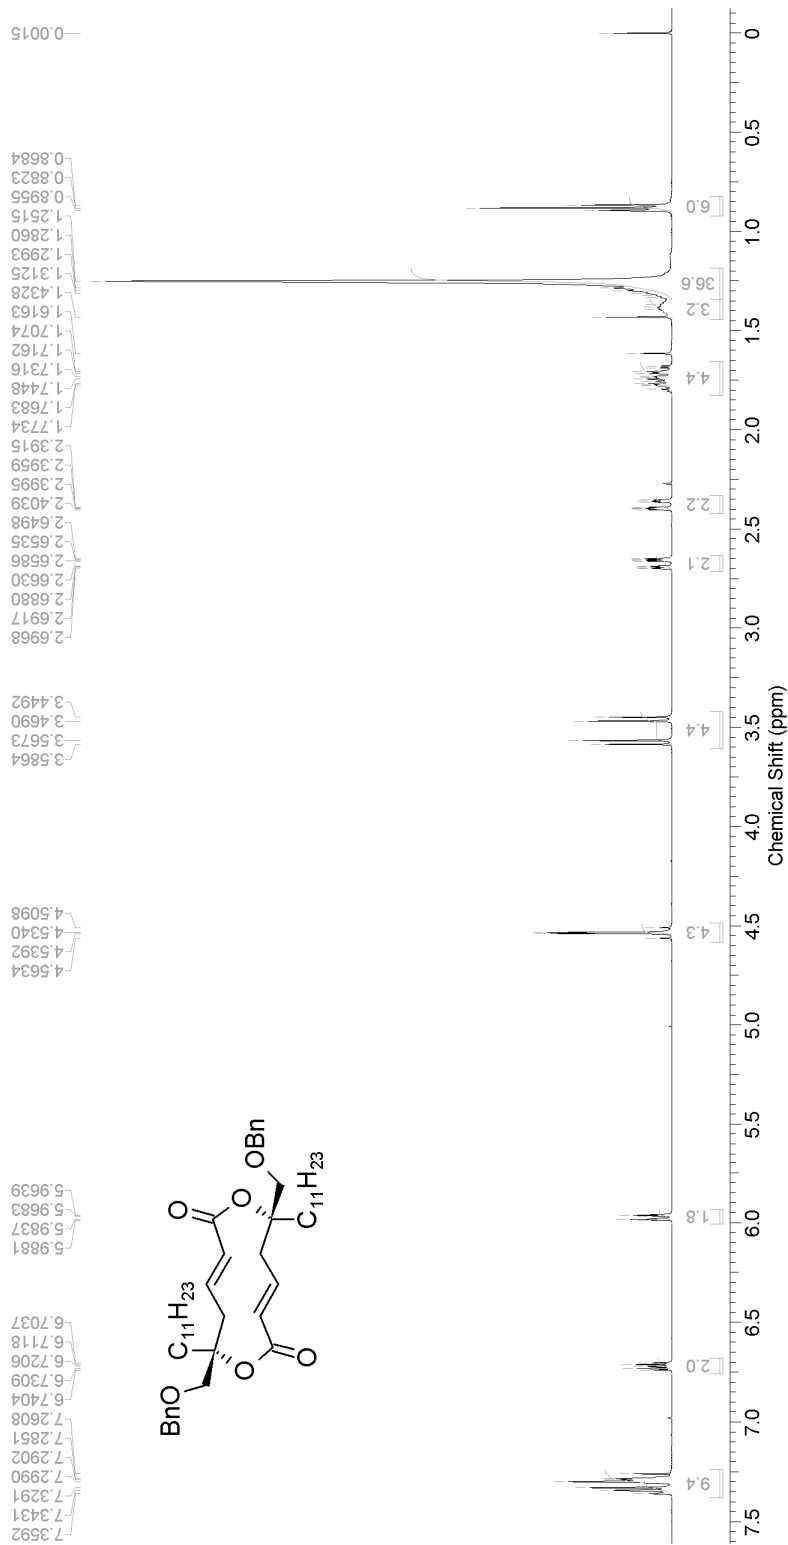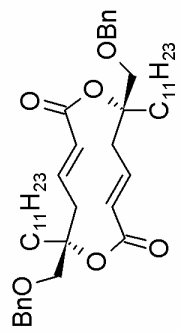

<sup>1</sup>H-NMR (500 MHz, CDCl<sub>3</sub>) of 12





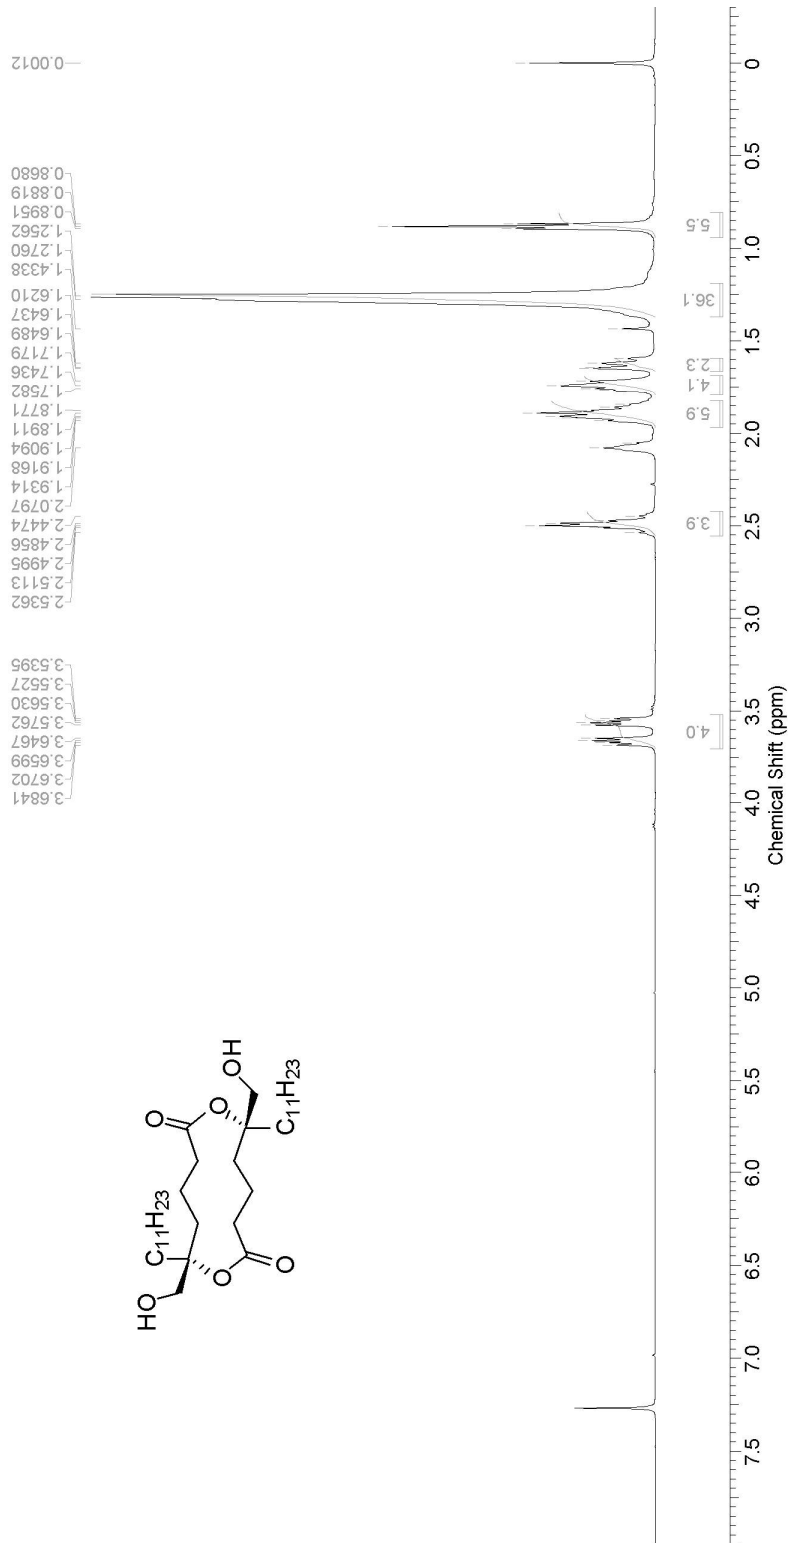

<sup>1</sup>H-NMR (500 MHz, CDCl<sub>3</sub>) of **5**

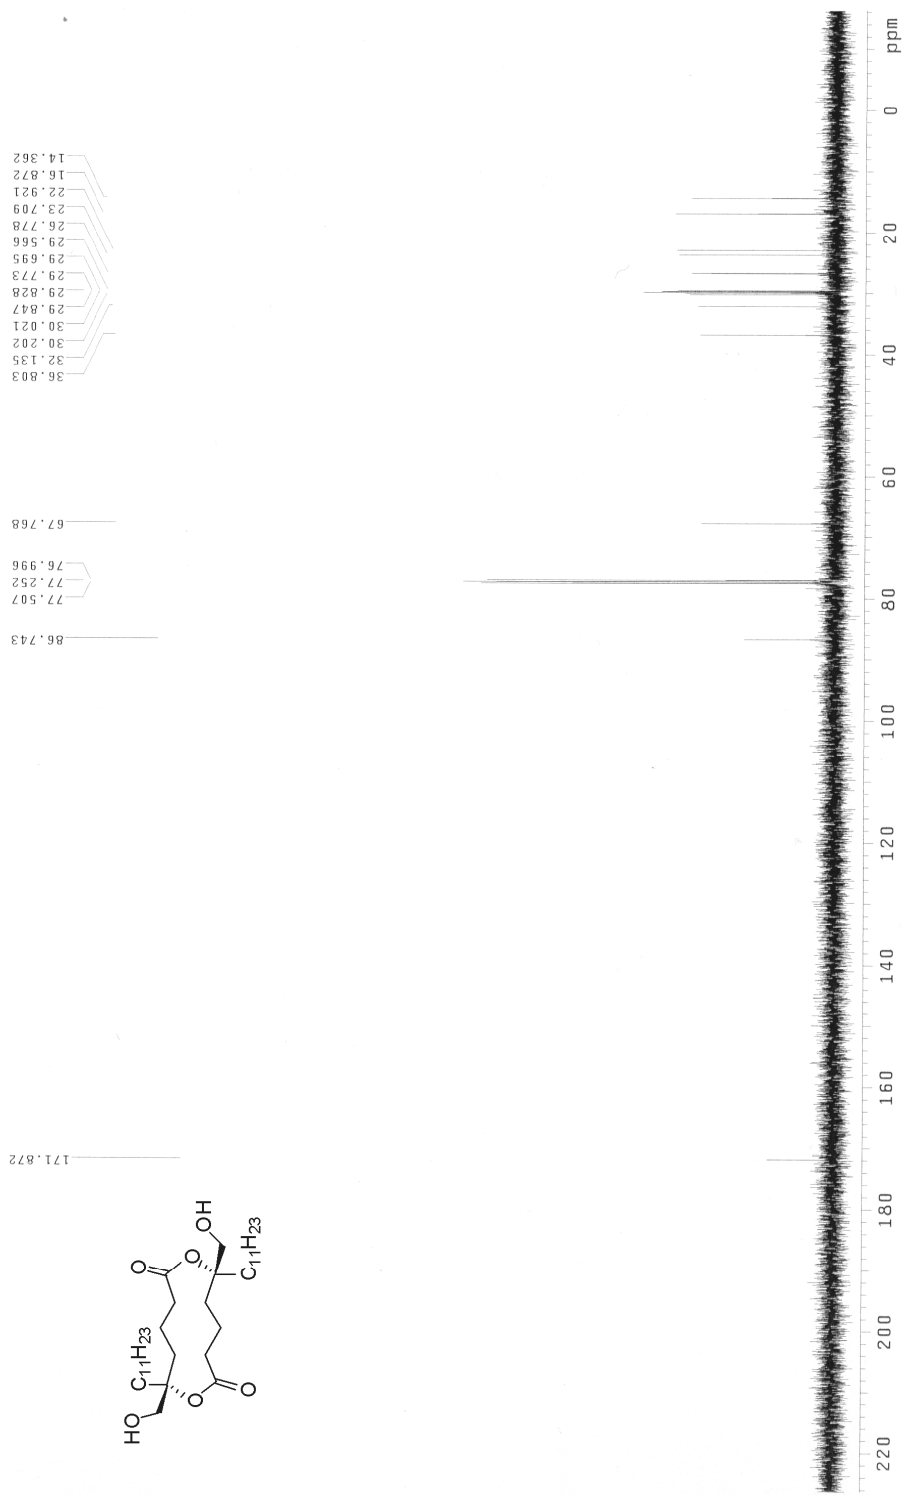

<sup>13</sup>C-NMR (125 MHz, CDCl<sub>3</sub>) of 5

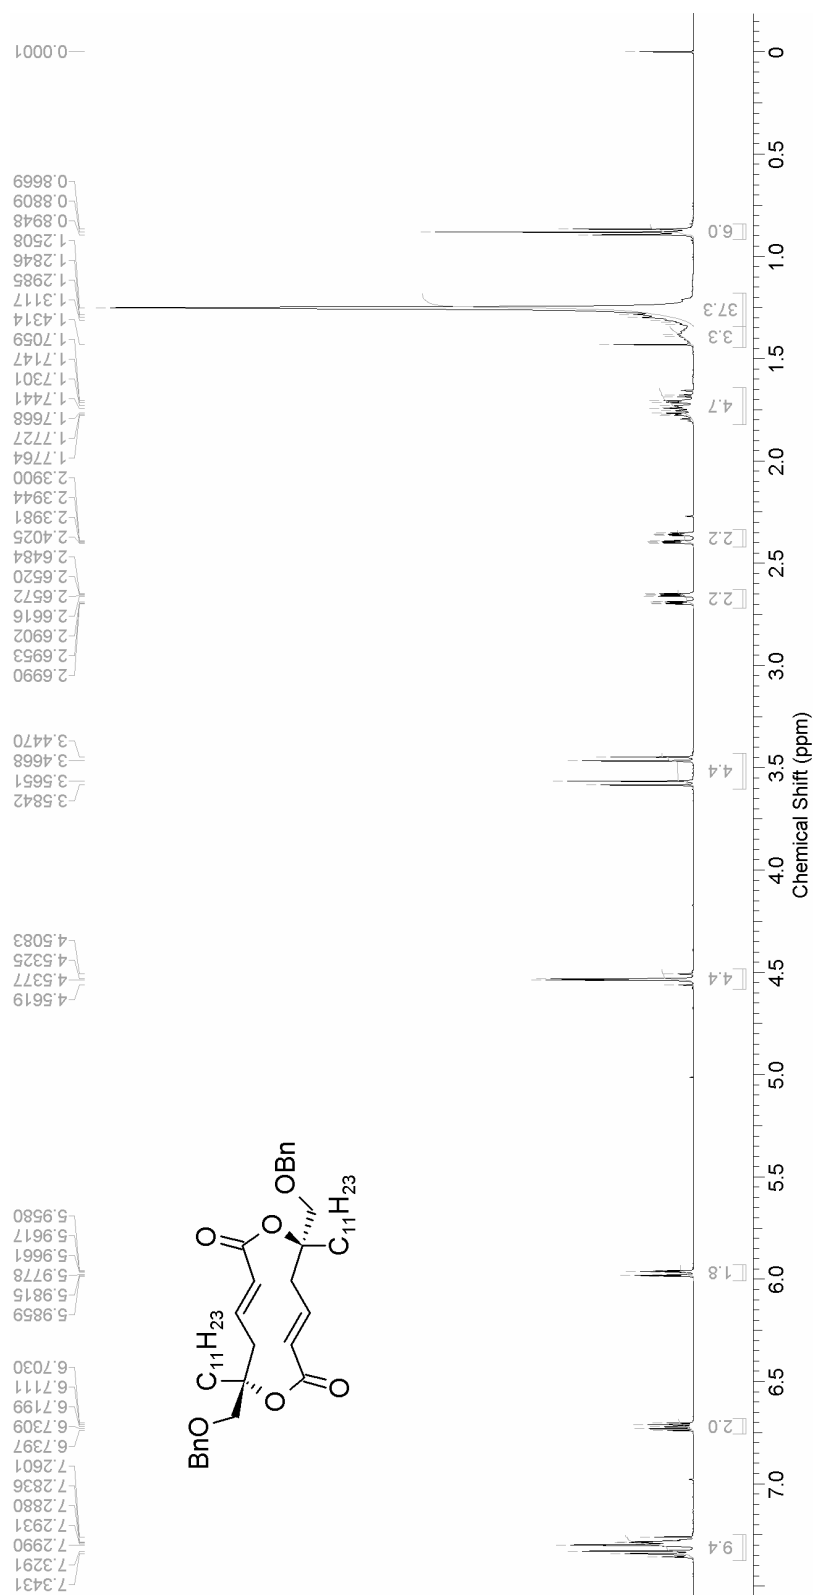

<sup>1</sup>H-NMR (500MHz, CDCl<sub>3</sub>) of initial olefin metathesis product of triene **14**

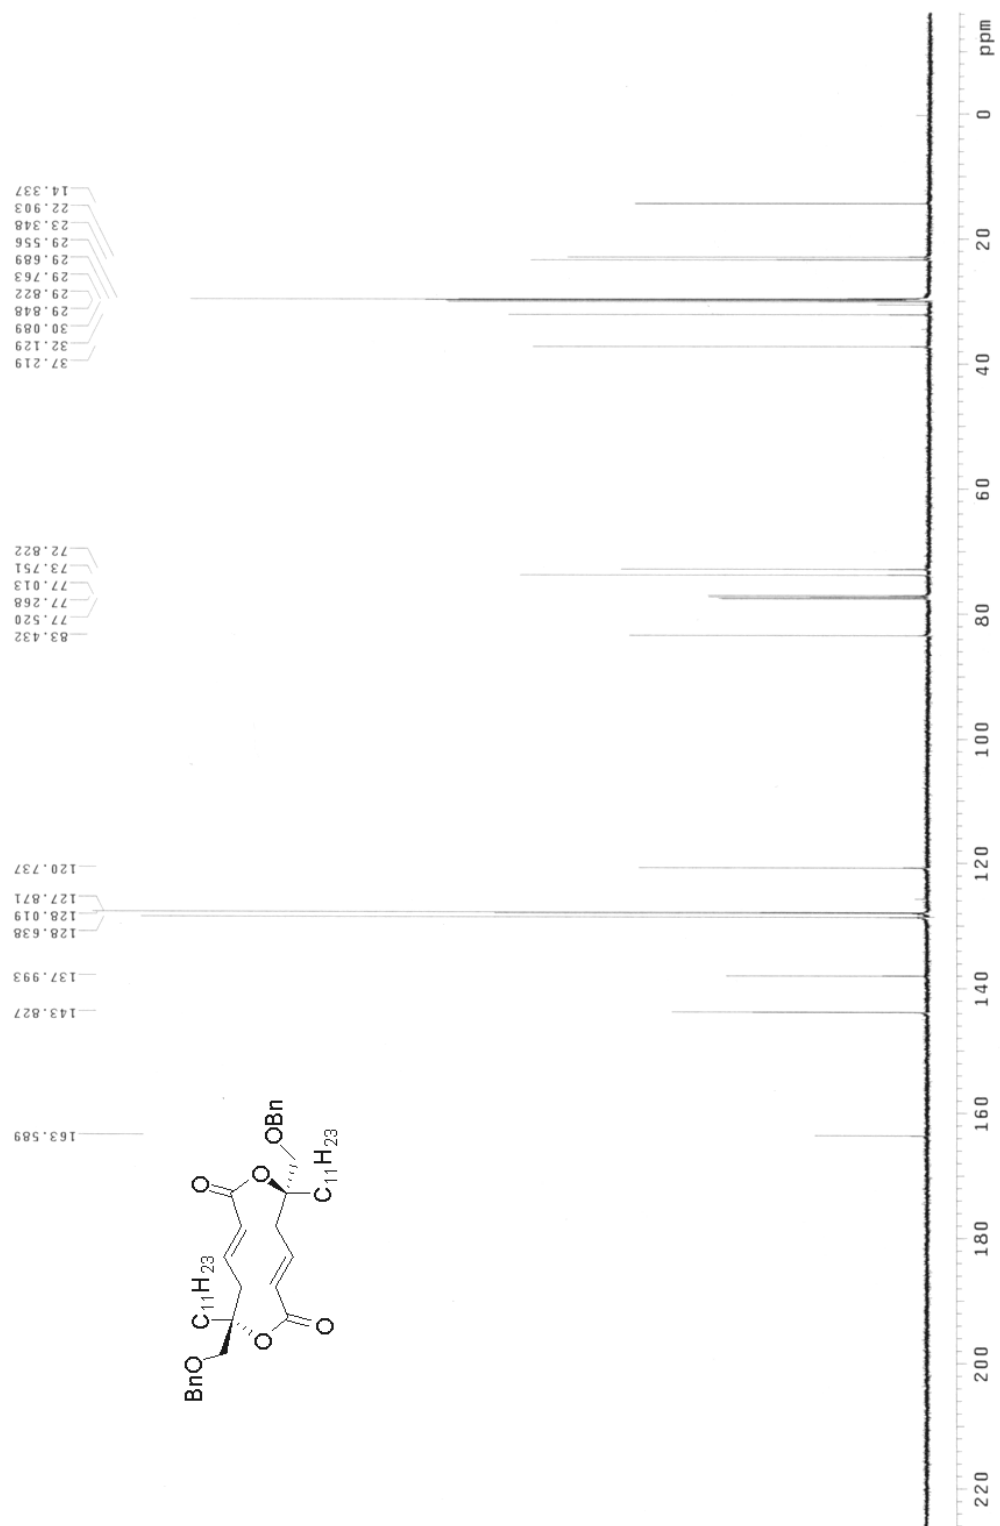

$^{13}\text{C}$ -NMR (125 MHz,  $\text{CDCl}_3$ ) of initial olefin metathesis product of triene **14**

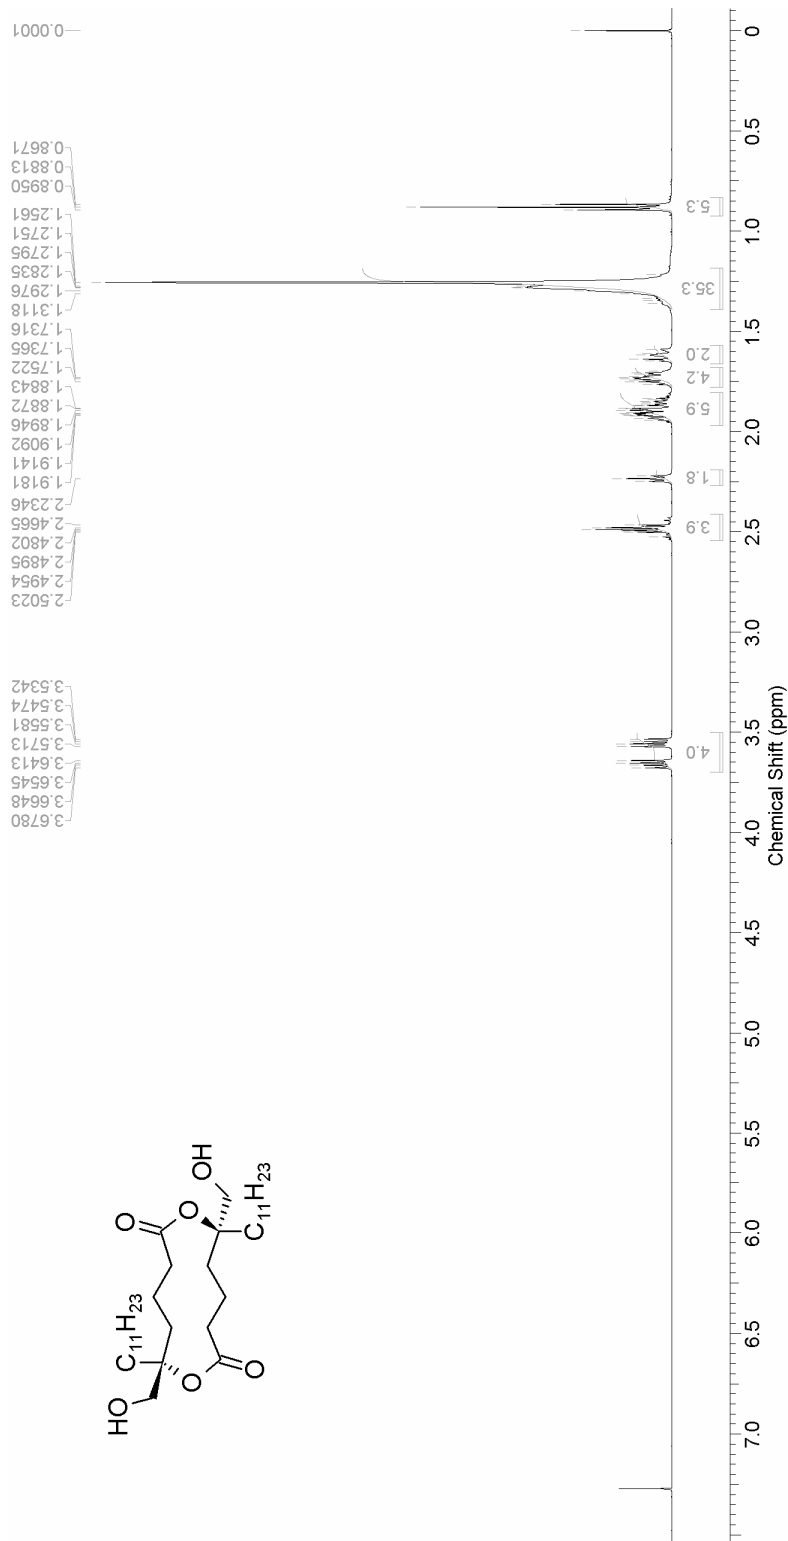

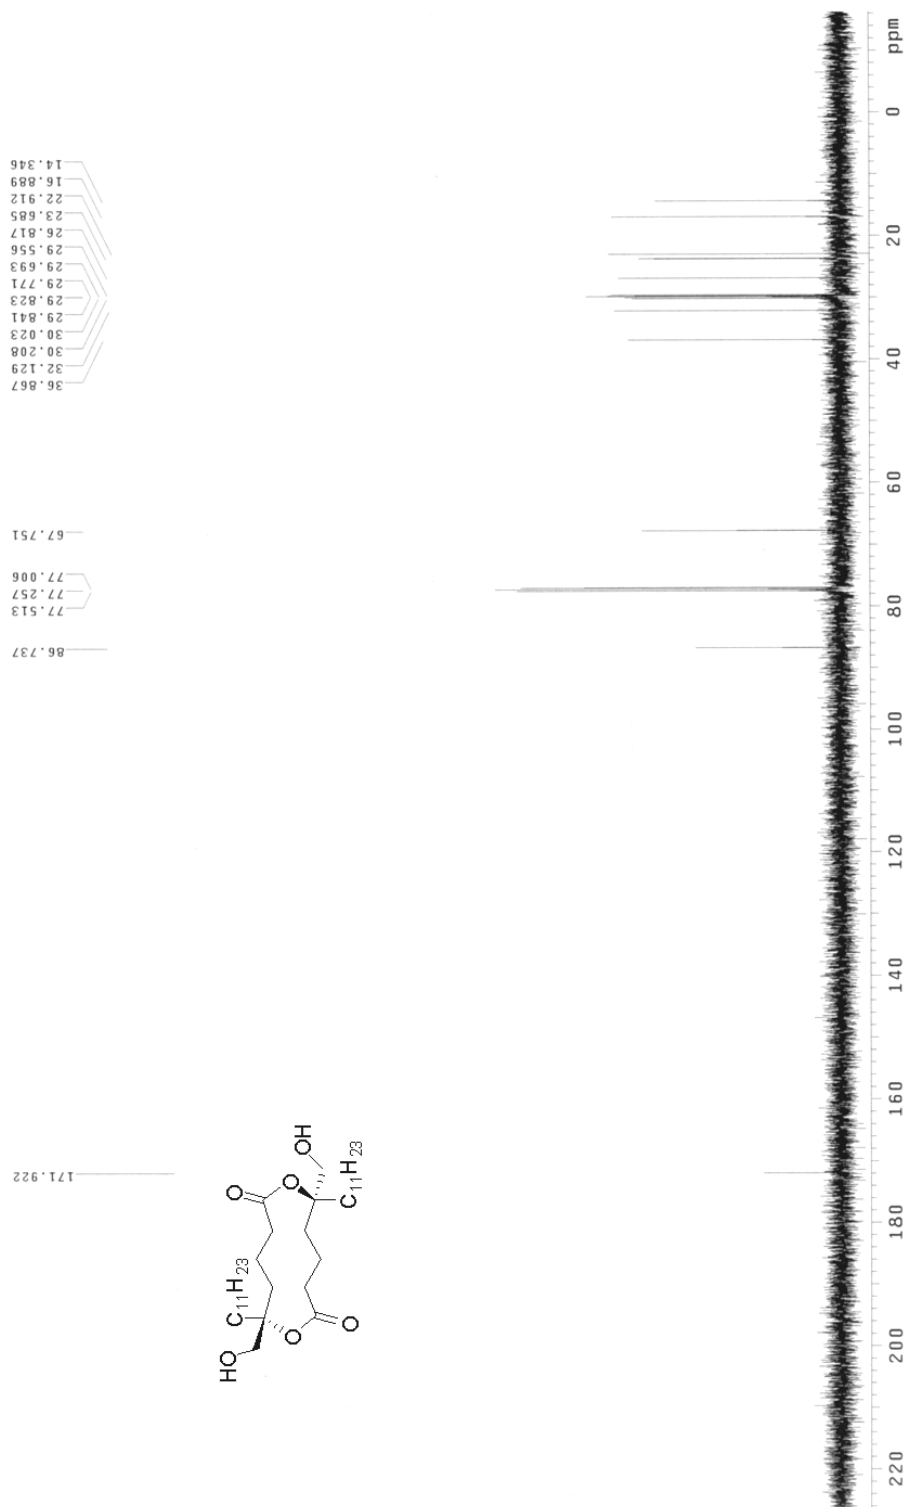

Inhibition dose response curves for compounds **4**, **5** and *ent-5* to SIRT1 and SIRT2

**Test results of Tanikolide Dimers Against Sirt1 and Sirt2**

|     | IC50 ± SE [µM] @ Sirt1 | IC50 ± SE [µM] @ Sirt2 |
|-----|------------------------|------------------------|
| R,R | 28,8 ± 4,3             | 2,4 ± 0,2              |
| S,S | 36,4 ± 8,1             | 3,3 ± 0,2              |
| R,S | 34,5 ± 3,5             | 3,1 ± 0,3              |

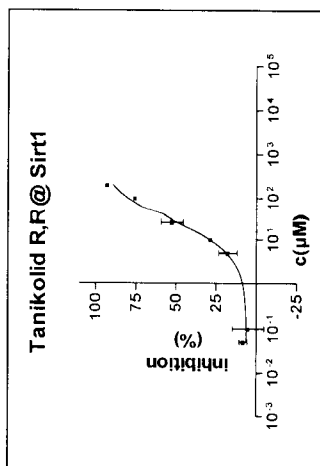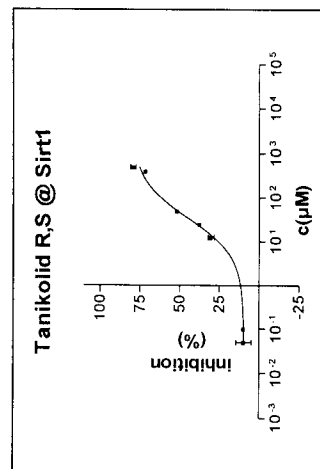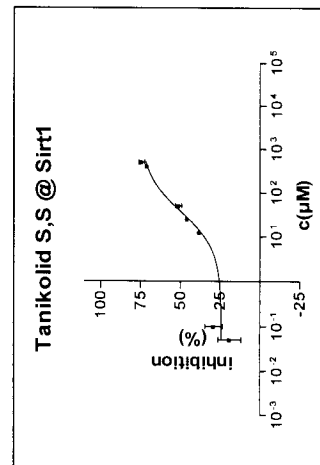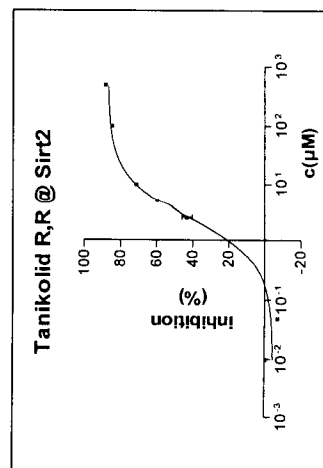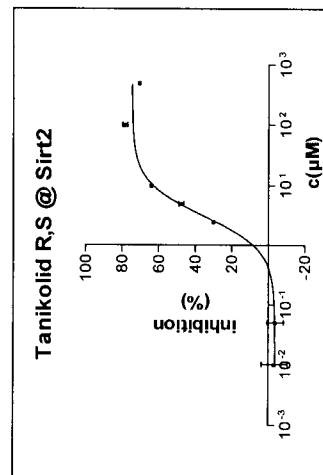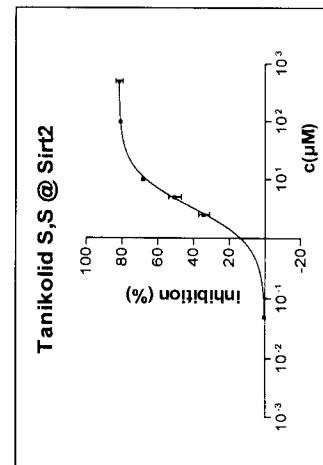

Copy

RT: 0.00 - 47.88

TANIKolide dimer

RS

Synthetic

- Chiral GC-MS Analysis

NL:  
5.31E5  
TIC F: MS  
TanikolideD  
IMER\_RS

$\Delta$ tes 0.33

Relative Abundance

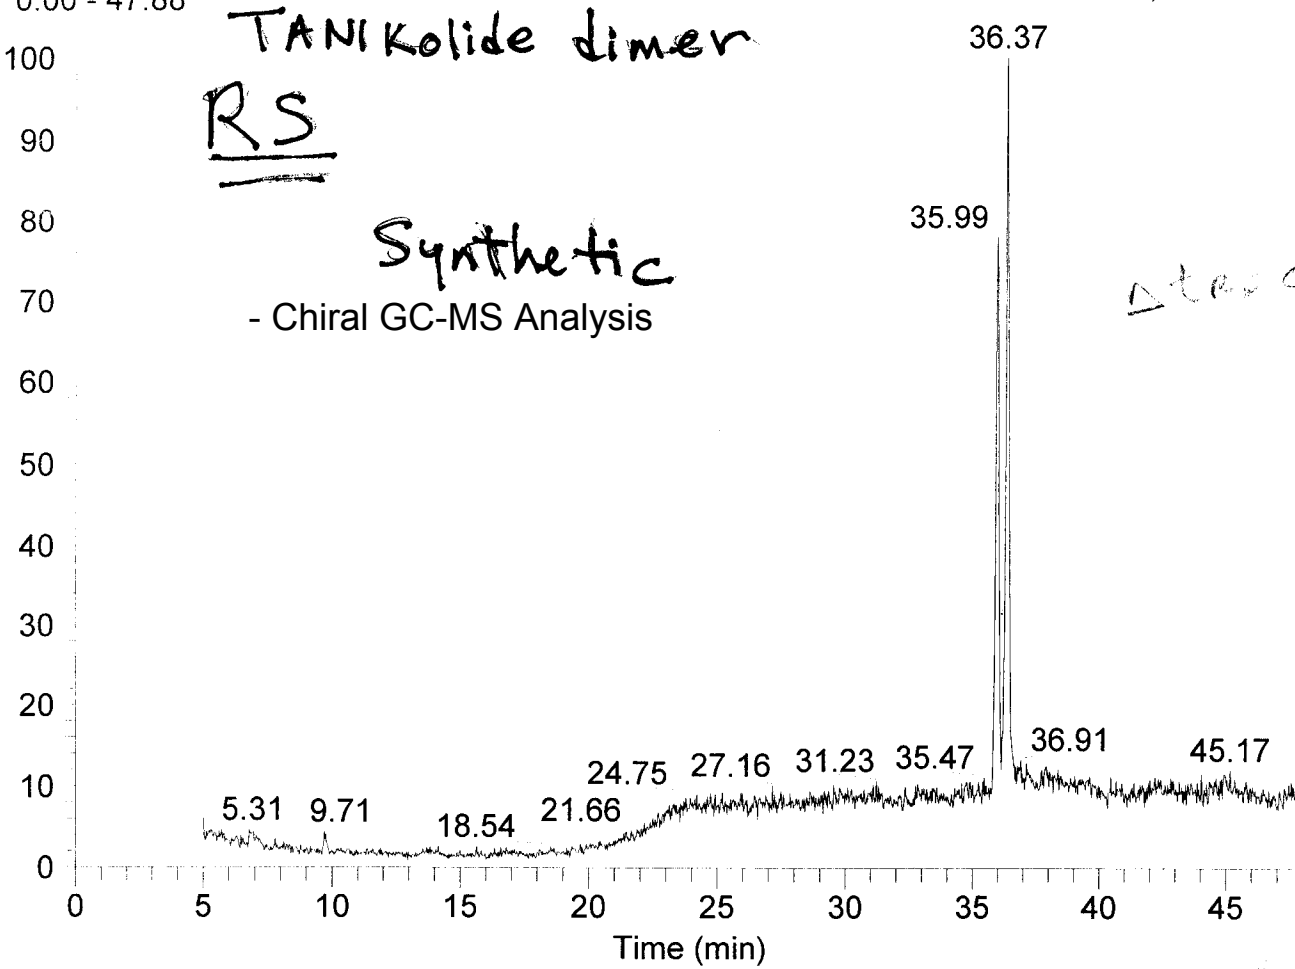

TanikolideDIMER\_RS #1212 RT: 35.99 AV: 1 NL: 4.13E4

T: + c Full ms [ 50.00-1000.00]

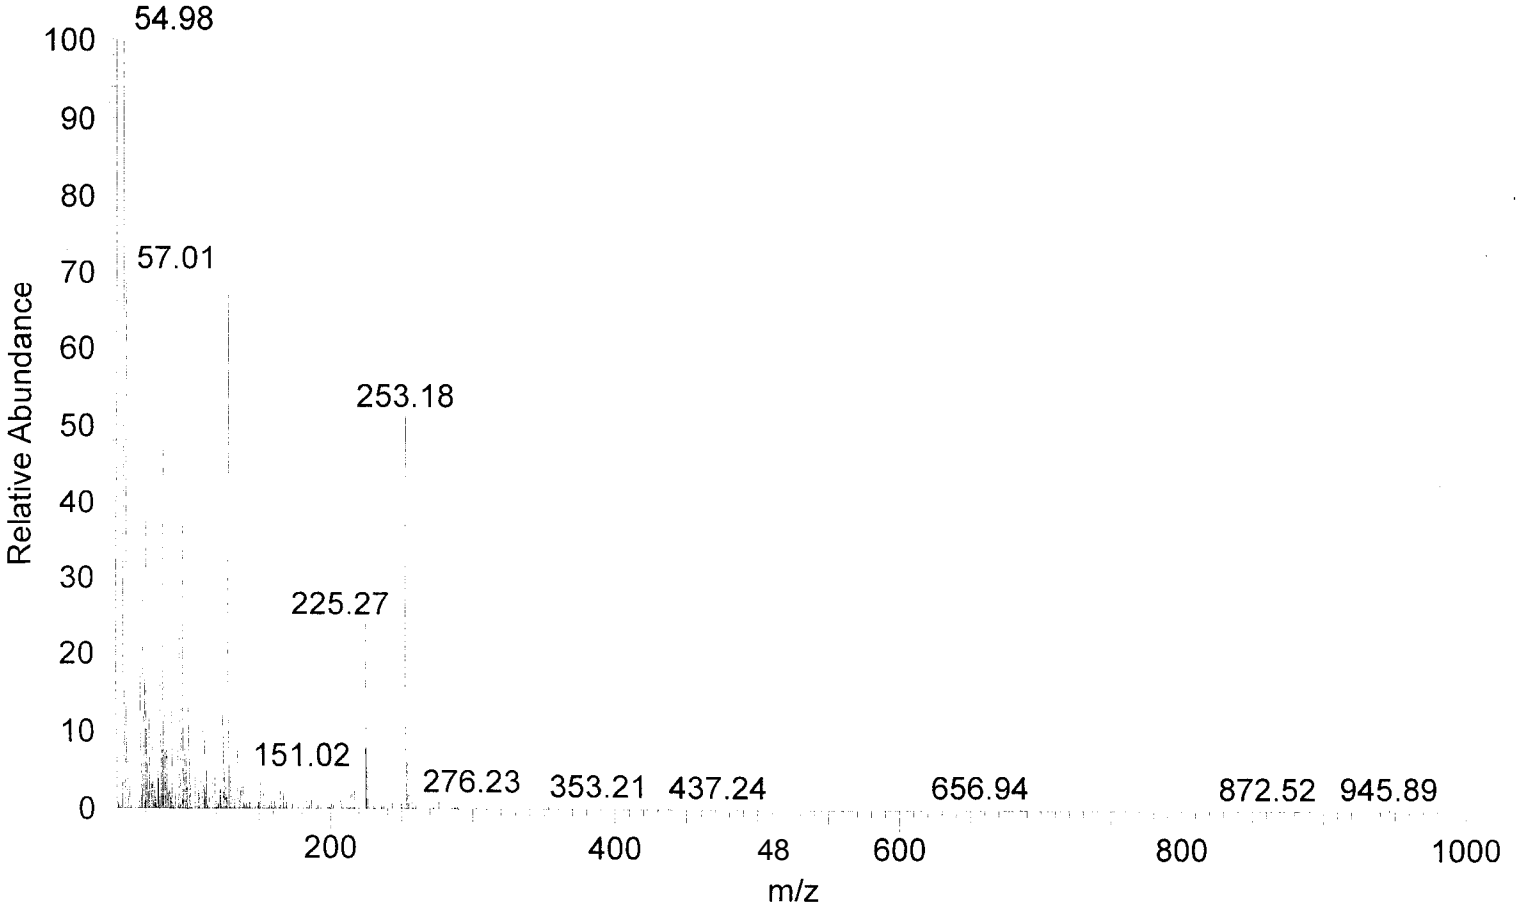



RT: 0.00 - 47.88

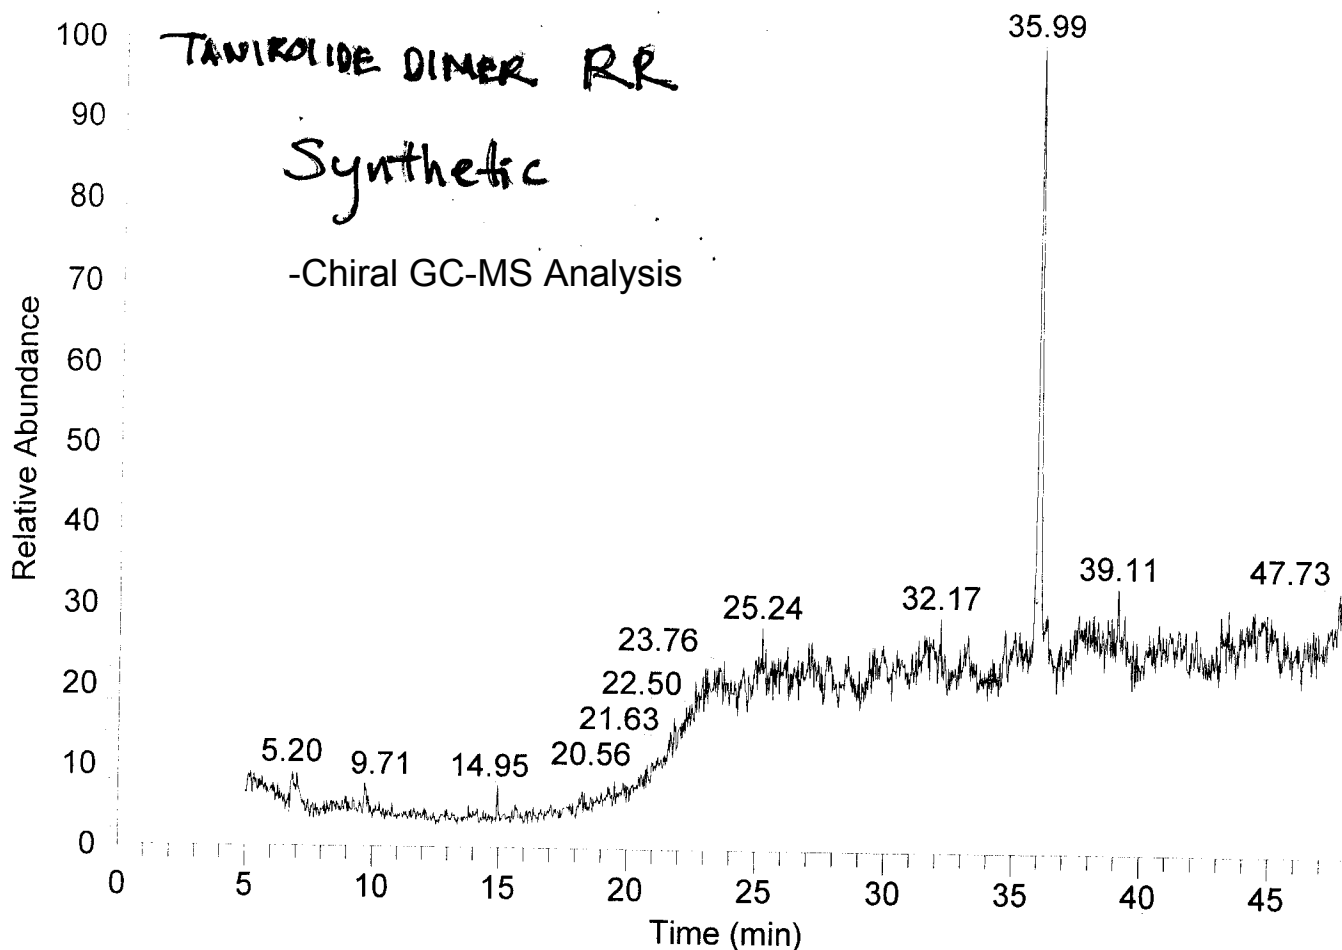

NL:  
4.41E5  
TIC F: MS  
TanikolideS  
YN\_RR

TanikolideSYN\_RR #1212 RT: 35.99 AV: 1 NL: 3.19E4  
T: + c Full ms [ 50.00-1000.00]

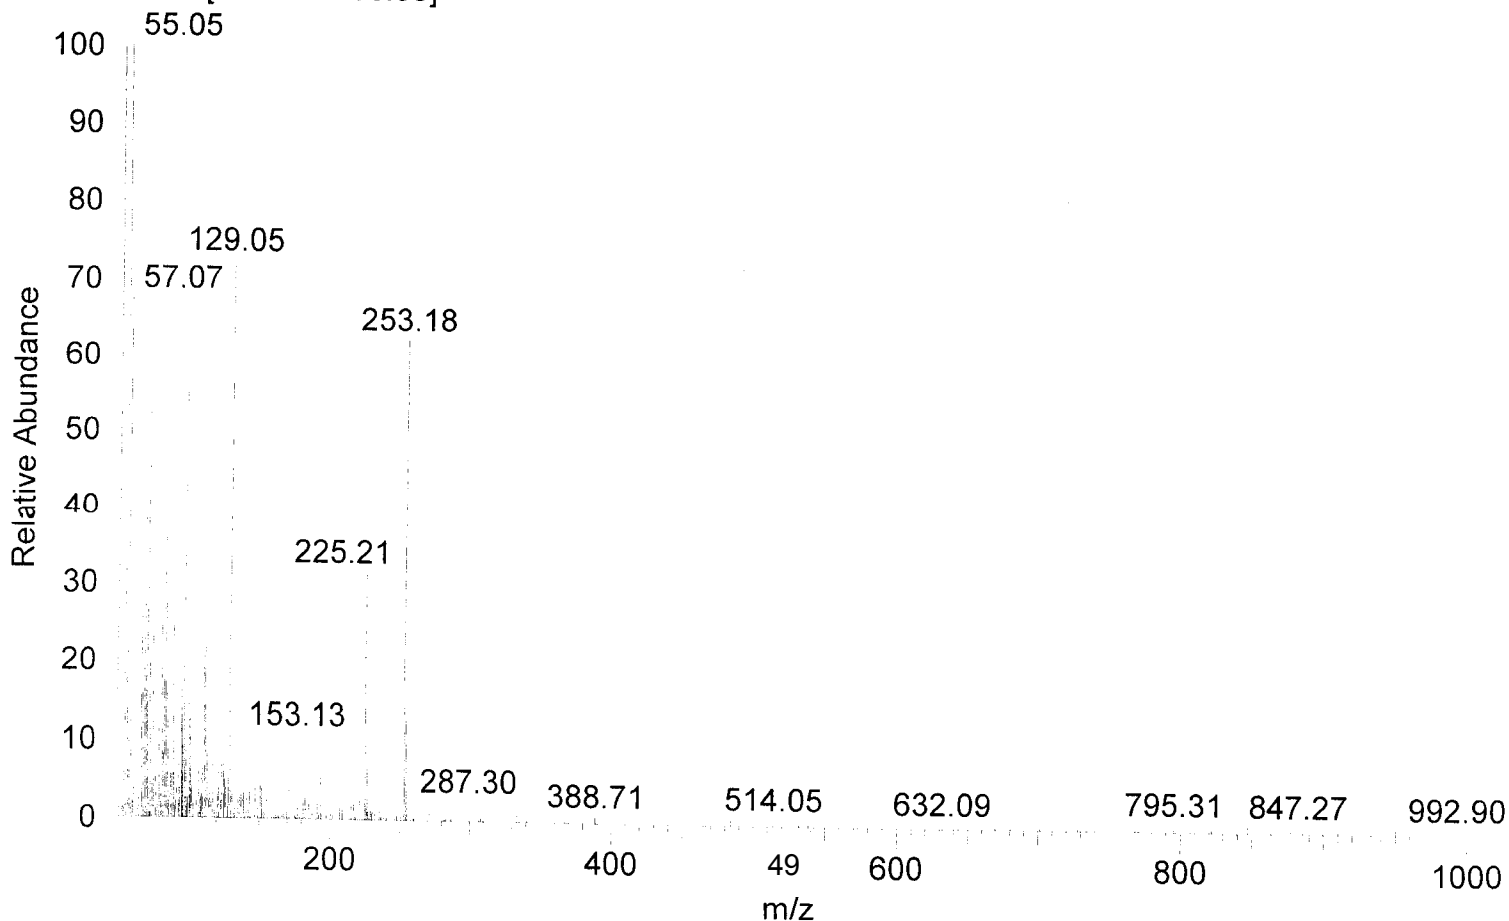

RT: 0.00 - 47.86

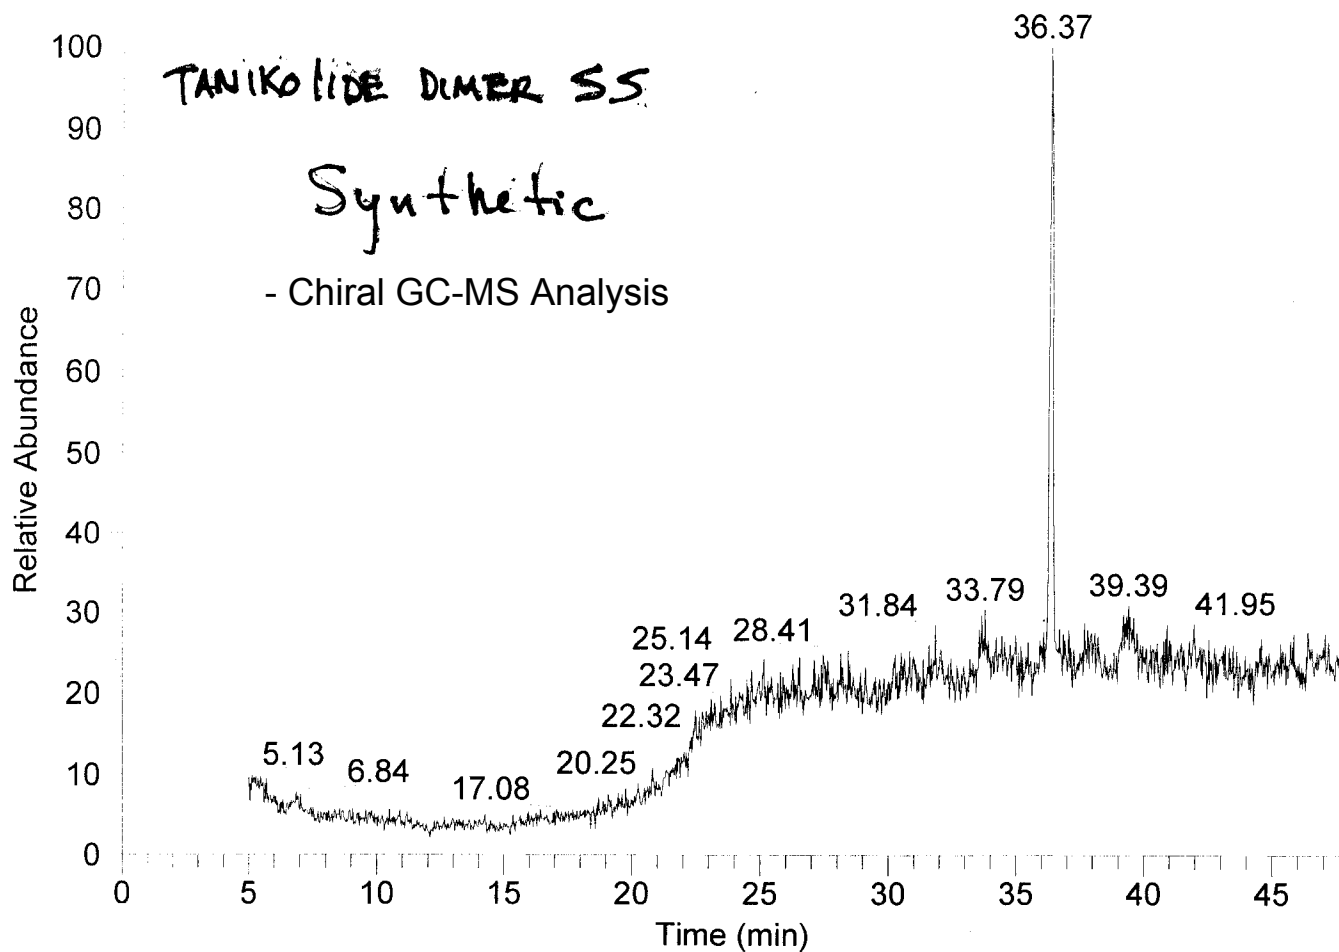

NL:  
3.57E5  
TIC F: MS  
TanikolideS  
YN\_SS

TanikolideSYN\_SS #1227 RT: 36.37 AV: 1 NL: 3.03E4  
T: + c Full ms [ 50.00-1000.00]

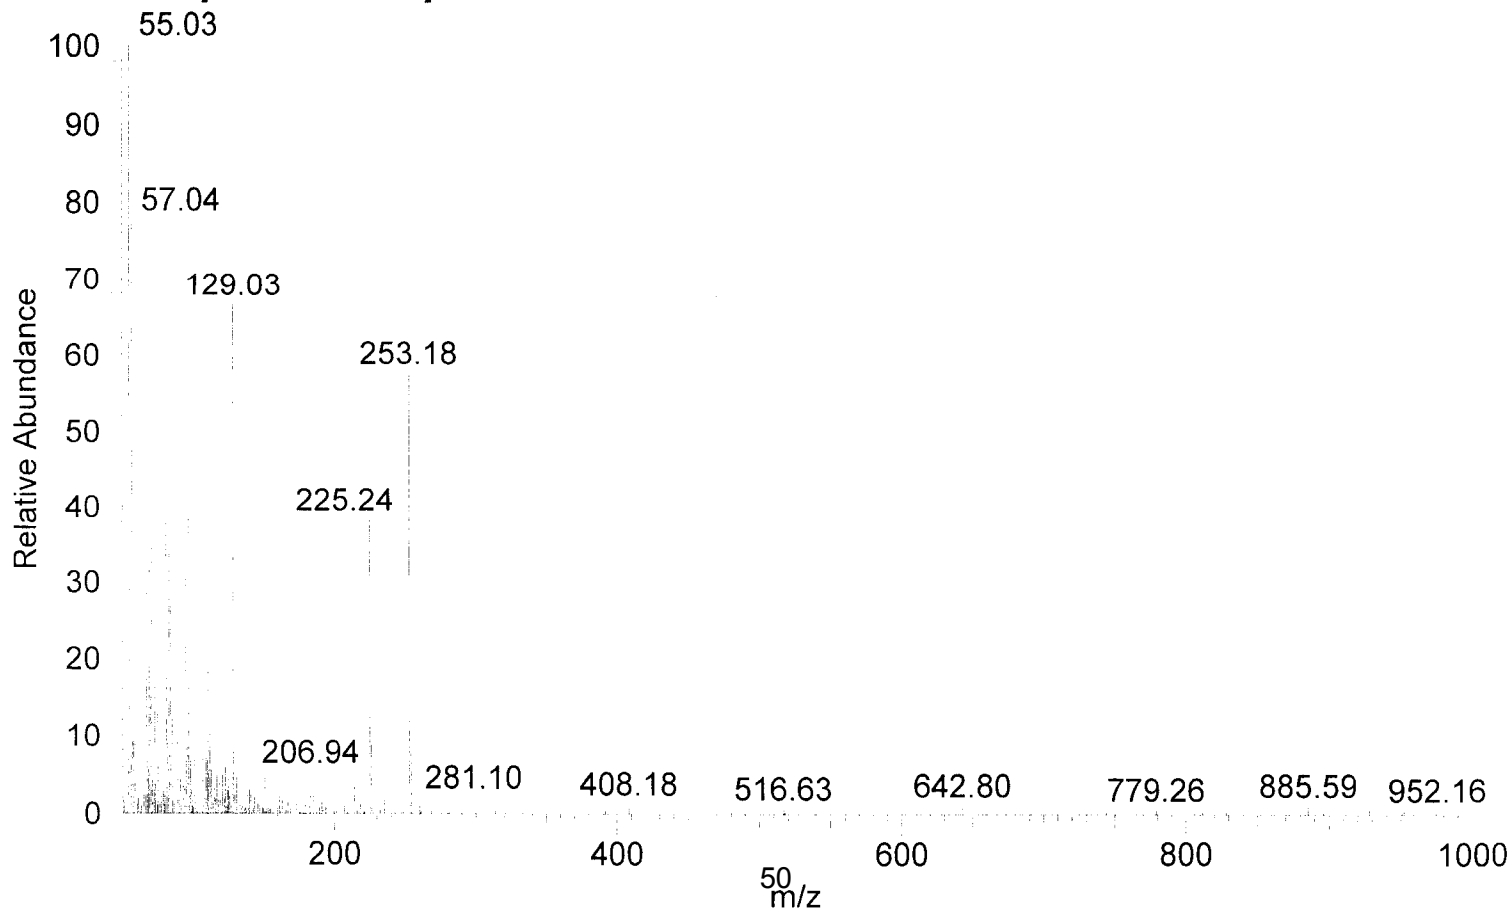

RT: 0.00 - 47.88

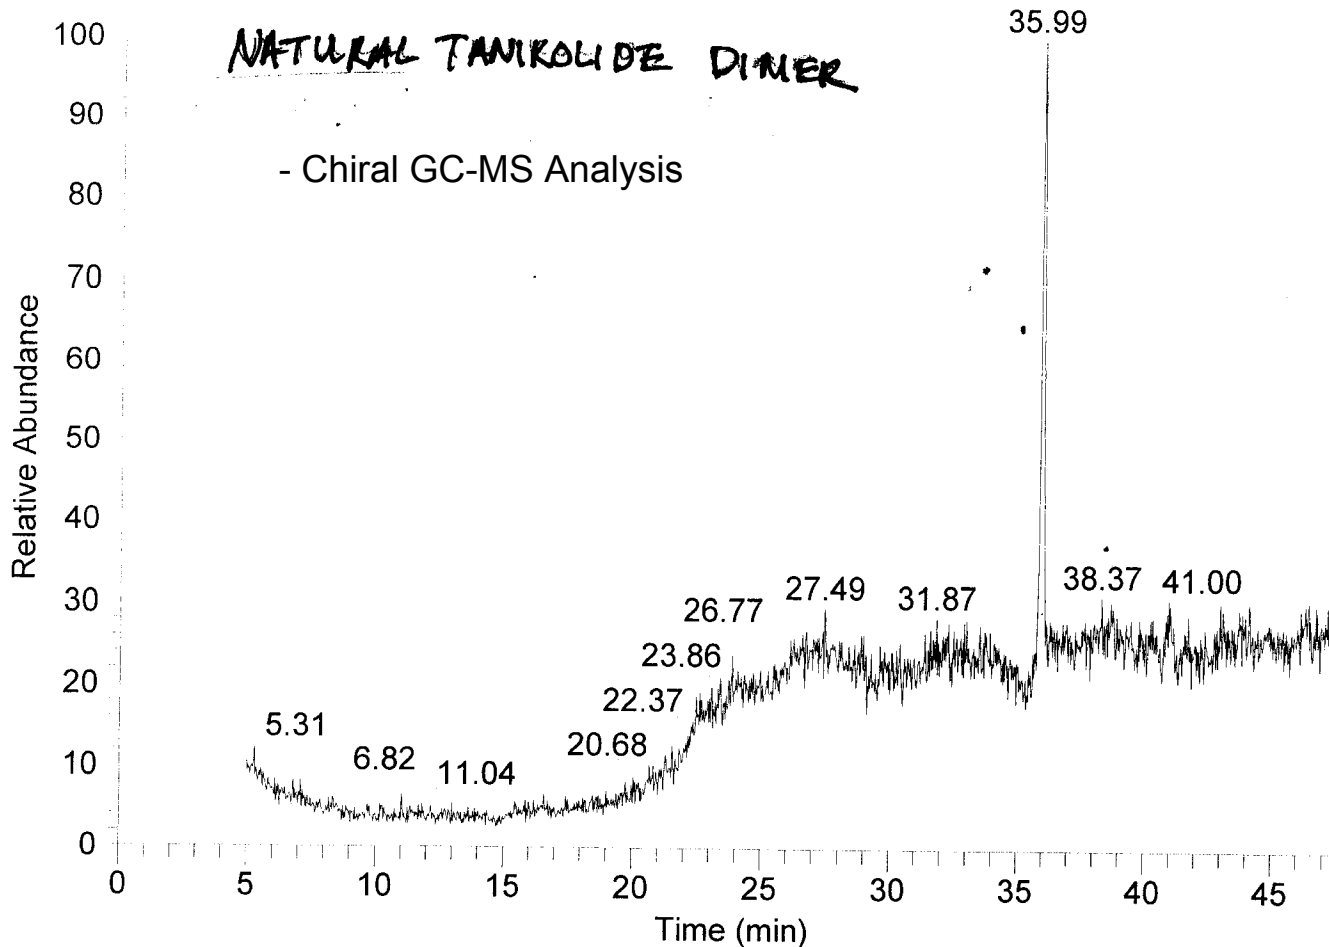

NL:  
3.06E5  
TIC F: MS  
NATURALT  
ANIKOLIDE  
2

NATURALTANIKOLIDE2 #1212 RT: 35.99 AV: 1 NL: 2.82E4  
T: + c Full ms [ 50.00-1000.00]

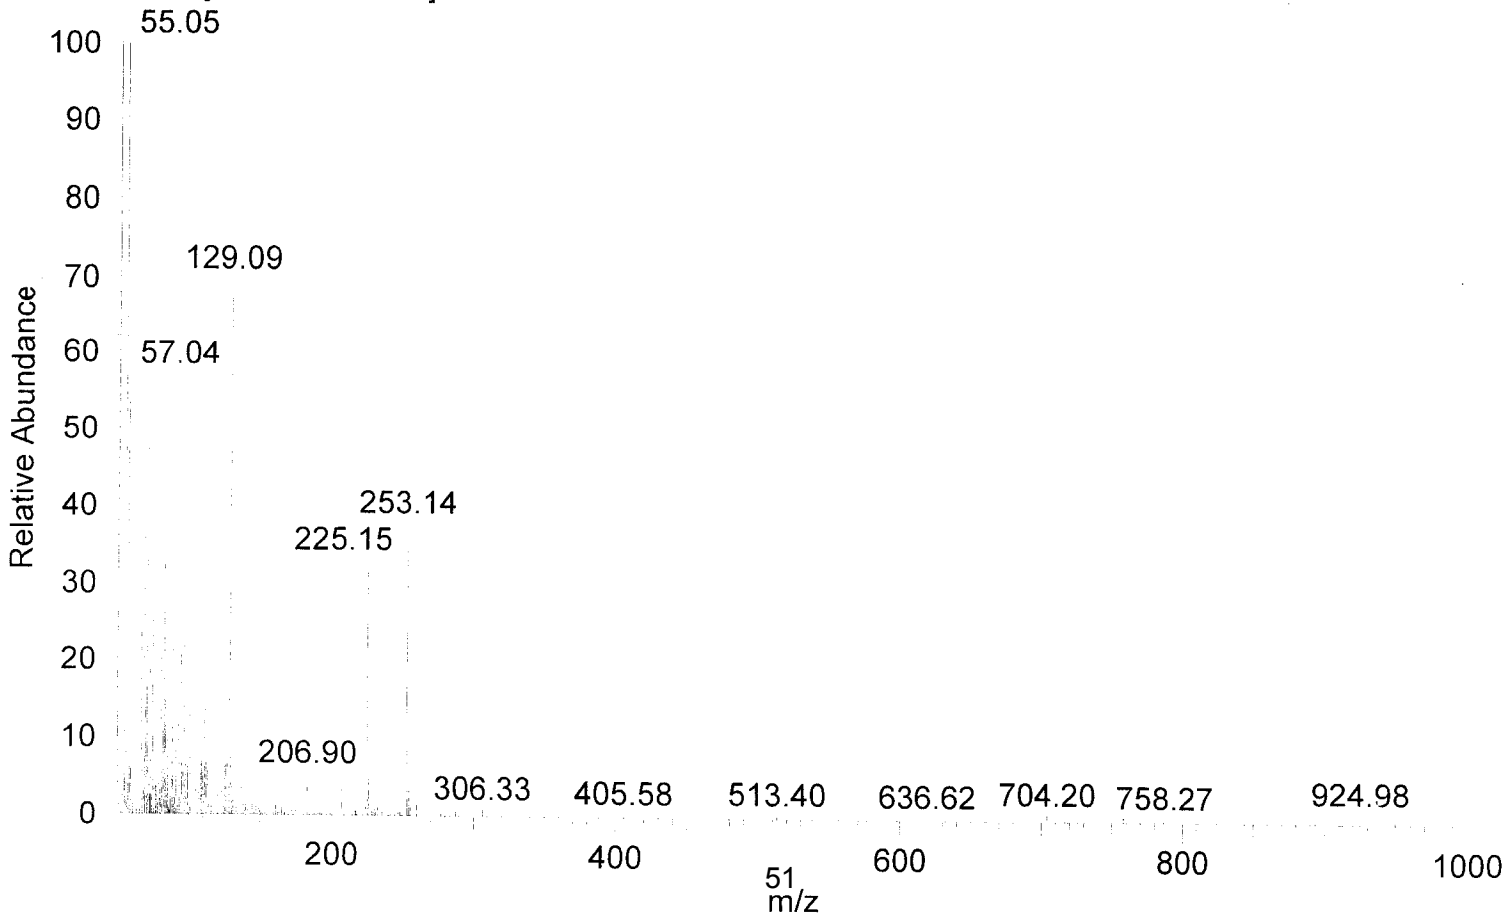

RT: 0.00 - 47.88

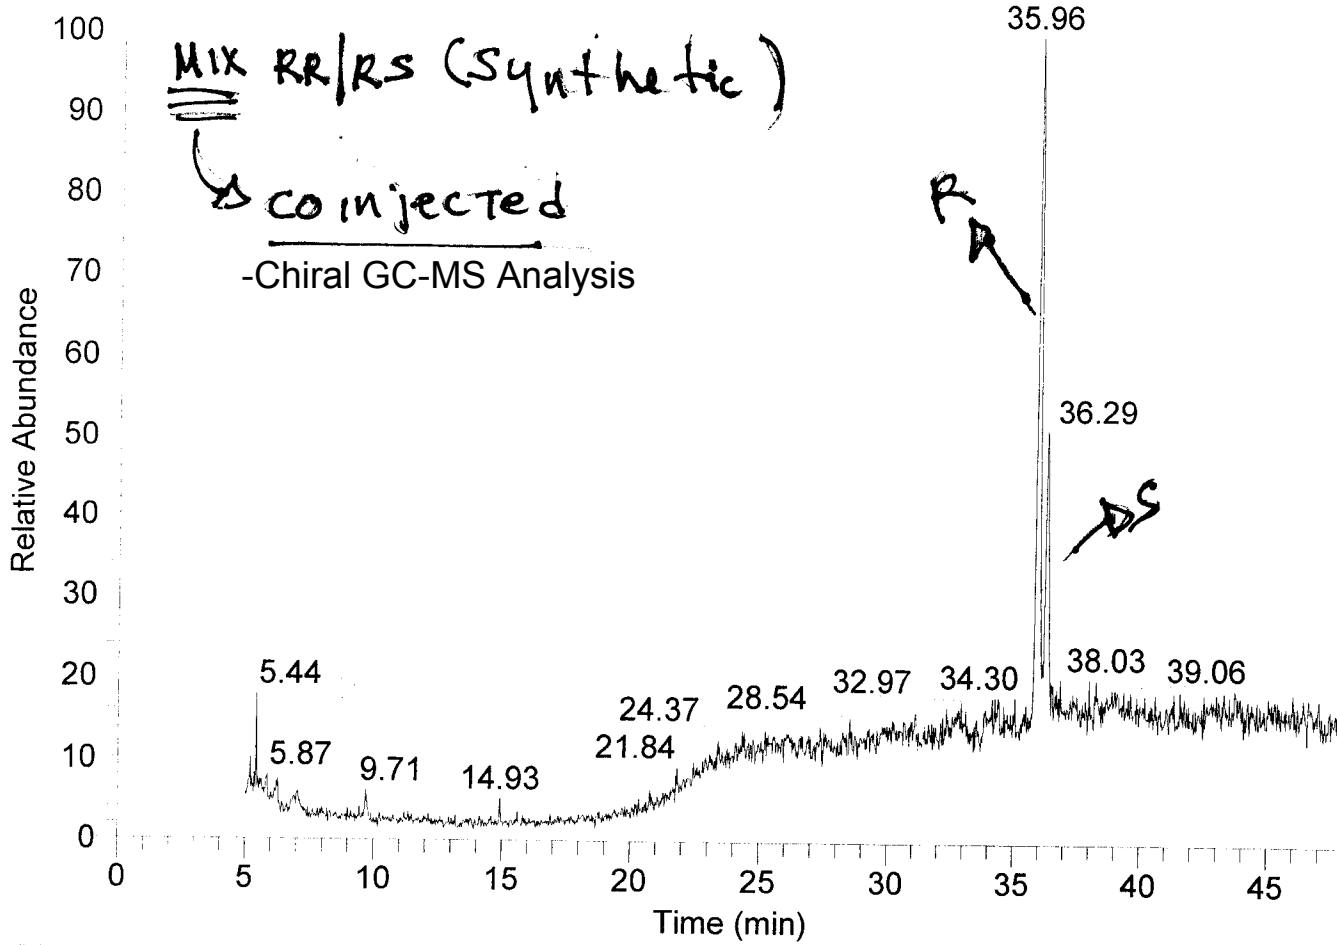

NL:  
4.55E5  
TIC F: MS  
MIX\_RR\_R  
STANIKOLI  
DEDIMER

MIX\_RR\_RSTANIKOLIDEDIMER #1211 RT: 35.96 AV: 1 NL: 4.89E4

T: + c Full ms [ 50.00-1000.00]

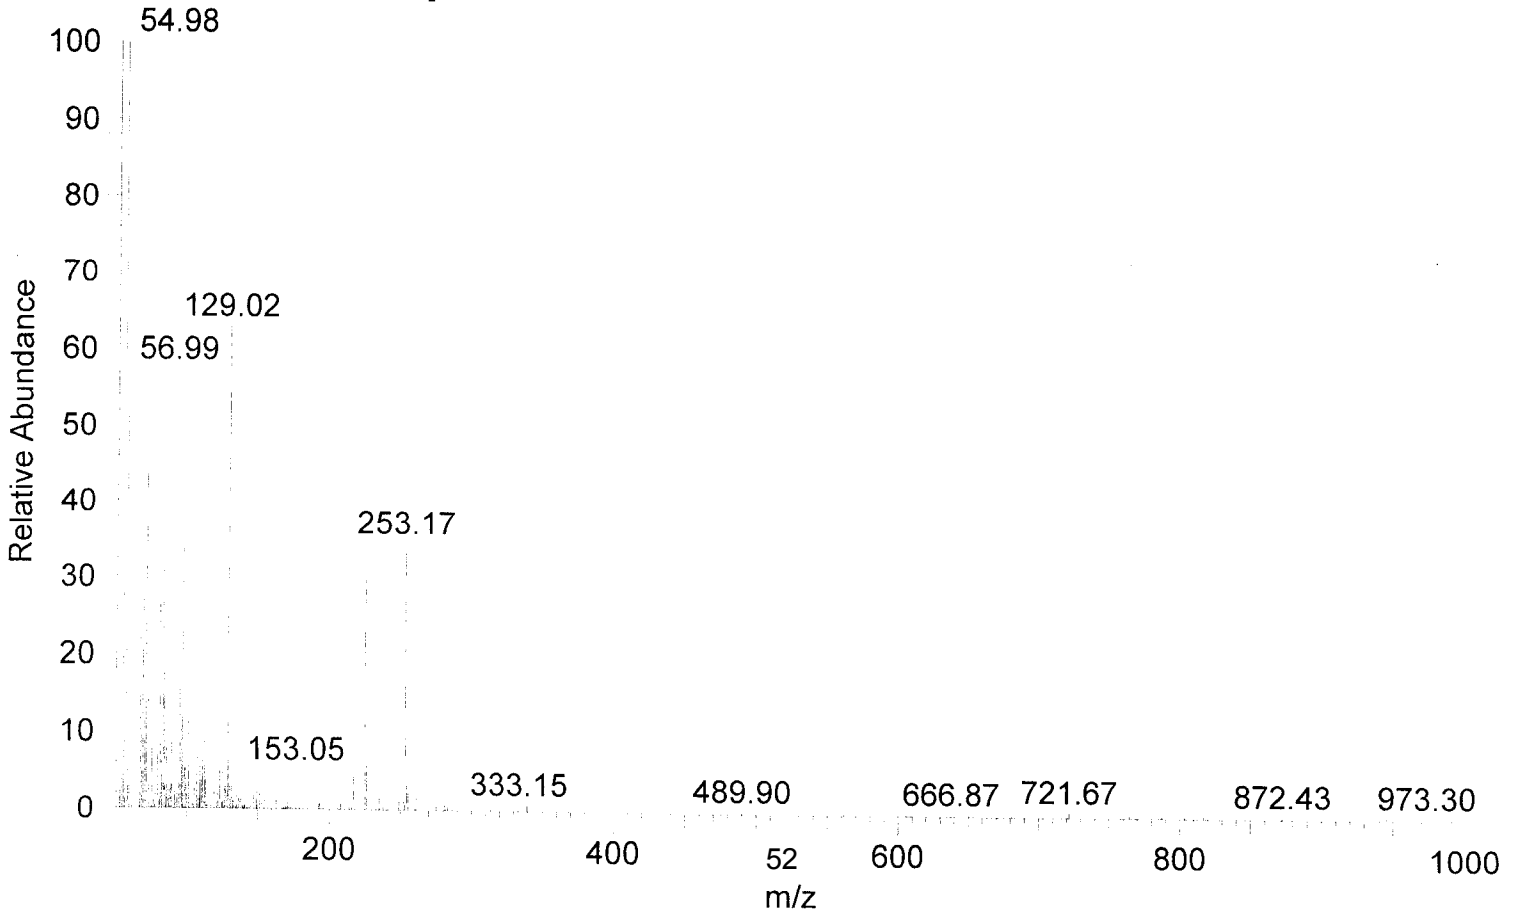

Supplement: NIHMS130152-supplement-2_si_002.pdf [file NIHMS130152-supplement-2_si_002.pdf]
